# Supplementary material for: Effect of incretin-based therapies on cancers of digestive system among 101 595 patients with type 2 diabetes mellitus: a systematic review and network meta-analysis combining 84 trials with a median duration of 30 weeks
Source: PubMed Central journal article supplement — BMJ Open Diabetes Res Care. 2019 Sep 20;7(1):e000728. doi: 10.1136/bmjdrc-2019-000728 (PMC6777405; doi:10.1136/bmjdrc-2019-000728), 2019-09-20

Appendix 4 Summary table of review authors' judgments for each risk of bias entry for each study

| Study ID                      | Outcome | NCT number  | Random Sequence generation | Allocation concealment | Blinding participants and personnel | Blinding of outcome assessment | of complete outcome data | selective reporting | Other (Funding by industries) |
|-------------------------------|---------|-------------|----------------------------|------------------------|-------------------------------------|--------------------------------|--------------------------|---------------------|-------------------------------|
| Bajaj M 2014                  | C       | NCT00996658 | Low risk                   | Low risk               | DB                                  | Low risk                       | Low risk                 | Low risk            | High risk                     |
| Barnett AH 2012               | C       | NCT00740051 | Low risk                   | Low risk               | DB                                  | Low risk                       | Low risk                 | Low risk            | High risk                     |
| Barzilai N 2011               | C       | NCT00305604 | Low risk                   | Low risk               | DB                                  | Low risk                       | High risk                | Low risk            | High risk                     |
| Bosi E 2011                   | CR      | NCT00432276 | Low risk                   | Low risk               | DB                                  | Low risk                       | High risk                | Low risk            | High risk                     |
| Chan JCN 2008                 | CP      | NCT00095056 | Low risk                   | Low risk               | DB                                  | Low risk                       | Low risk                 | Low risk            | High risk                     |
| ENDURE 2013                   | CR      | NCT00856284 | Low risk                   | Low risk               | DB                                  | unclear                        | Low risk                 | Low risk            | High risk                     |
| EXAMINE White WB 2013         | CGHR    | NCT00968708 | Low risk                   | Low risk               | QB                                  | Low risk                       | Low risk                 | Low risk            | High risk                     |
| GENERATION Scherthaner G 2015 | CHP     | NCT01006603 | Low risk                   | Low risk               | DB                                  | Low risk                       | Low risk                 | Low risk            | High risk                     |
| Gallwitz B 2012               | CGPR    | NCT00622284 | Low risk                   | Low risk               | DB                                  | Low risk                       | Low risk                 | Low risk            | High risk                     |
| Göke B 2013                   | C       | NCT00575588 | Low risk                   | Low risk               | QB                                  | Low risk                       | Low risk                 | Low risk            | High risk                     |
| Haak T 2013                   | C       | NCT00915772 | Low risk                   | Low risk               | DB                                  | Low risk                       | unclear                  | Low risk            | High risk                     |
| Harley P 2015                 | C       | NCT01189890 | Low risk                   | Low risk               | DB                                  | Low risk                       | Low risk                 | Low risk            | High risk                     |
| Laakso M 2015                 | C       | NCT01087502 | Low risk                   | Low risk               | DB                                  | Low risk                       | Low risk                 | Low risk            | High risk                     |
| NCT00295633 2014              | C       | NCT00295633 | Low risk                   | Low risk               | DB                                  | Low risk                       | Low risk                 | Low risk            | High risk                     |
| NCT00374907 2008              | C       | NCT00374907 | Low risk                   | Low risk               | DB                                  | Low risk                       | Low risk                 | Low risk            | High risk                     |
| NCT00813995 2014              | C       | NCT00813995 | Low risk                   | Low risk               | DB                                  | Low risk                       | Low risk                 | unclear             | High risk                     |
| NCT01183013 2014              | CR      | NCT01183013 | Low risk                   | Low risk               | DB                                  | Low risk                       | Low risk                 | Low risk            | High risk                     |
| Nauck M 2007                  | CGHR    | NCT00094770 | Low risk                   | Low risk               | DB                                  | Low risk                       | Low risk                 | Low risk            | High risk                     |
| Olansky L 2011                | C       | NCT00482729 | Low risk                   | Low risk               | DB                                  | Low risk                       | Low risk                 | Low risk            | High risk                     |
| Pratley RE 2009               | C       | NCT00286494 | Low risk                   | Low risk               | QB                                  | Low risk                       | Low risk                 | Low risk            | High risk                     |
| Raz I 2008                    | CP      | NCT00337610 | Low risk                   | Low risk               | DB                                  | Low risk                       | Low risk                 | Low risk            | High risk                     |
| Roden M 2013                  | C       | NCT01177813 | Low risk                   | Low risk               | DB                                  | Low risk                       | Low risk                 | Low risk            | High risk                     |
| Rosenstock J 2009             | C       | NCT00121641 | Low risk                   | Low risk               | DB                                  | Low risk                       | Low risk                 | Low risk            | High risk                     |
| Rosenstock J 2010             | C       | NCT00395512 | Low risk                   | Low risk               | QB                                  | Low risk                       | Low risk                 | Low risk            | High risk                     |
| SAVOR-TIMI 53 Raz I 2014      | CGHPR   | NCT01107886 | Low risk                   | Low risk               | QB                                  | Low risk                       | Low risk                 | Low risk            | High risk                     |
| Shankar RR 2017               | CH      | NCT01755156 | Low risk                   | Low risk               | TB                                  | Low risk                       | Low risk                 | Low risk            | High risk                     |
| Sheu W 2015                   | CGH     | NCT00954447 | Low risk                   | Low risk               | DB                                  | Low risk                       | Low risk                 | Low risk            | High risk                     |
| Wainstein J 2012              | C       | NCT00532935 | Low risk                   | Low risk               | DB                                  | Low risk                       | Low risk                 | Low risk            | High risk                     |
| Araki E 2015                  | CH      | NCT01584232 | Low risk                   | Low risk               | open                                | High risk                      | Low risk                 | Low risk            | High risk                     |
| Davies MJ 2016                | H       | NCT01620489 | Low risk                   | Low risk               | DB                                  | Low risk                       | Low risk                 | Low risk            | High risk                     |
| EUREXA Gallwitz B 2012        | CR      | NCT00359762 | Low risk                   | Low risk               | open                                | High risk                      | Low risk                 | Low risk            | High risk                     |
| GetGoal-DUO-1 Riddle MC 2013  | C       | NCT00975286 | Low risk                   | Low risk               | DB                                  | Low risk                       | Low risk                 | Low risk            | High risk                     |
| GetGoal-Mono Fonseca VA 2012  | C       | NCT00688701 | Low risk                   | Low risk               | QB                                  | Low risk                       | Low risk                 | Low risk            | High risk                     |
| HARMONY-2 Nauck MA 2016       | C       | NCT00849017 | Low risk                   | Low risk               | DB                                  | Low risk                       | Low risk                 | Low risk            | High risk                     |
| HARMONY-6 Rosenstock J 2014   | C       | NCT00976391 | Low risk                   | unclear                | open                                | High risk                      | Low risk                 | Low risk            | High risk                     |

|                                          |       |             |          |          |      |           |          |          |           |
|------------------------------------------|-------|-------------|----------|----------|------|-----------|----------|----------|-----------|
| LEAD-2 Nauck M 2009                      | CHR   | NCT00318461 | Low risk | Low risk | DB   | Low risk  | Low risk | Low risk | High risk |
| LEAD-3 Garber A 2011                     | C     | NCT00294723 | Low risk | Low risk | DB   | Low risk  | Low risk | Low risk | High risk |
| LEADER Marre M 2015                      | CGHPR | NCT01179048 | Low risk | Low risk | DB   | Low risk  | Low risk | Low risk | High risk |
| Miyagawa J 2015                          | CP    | NCT01558271 | Low risk | Low risk | DB   | Low risk  | Low risk | Low risk | High risk |
| Pfeffer MA 2015                          | CGHPR | NCT01147250 | Low risk | Low risk | TB   | Low risk  | Low risk | Low risk | High risk |
| Umpierrez GE 2011                        | C     | NCT00630825 | Low risk | Low risk | TB   | Low risk  | Low risk | Low risk | High risk |
| CANTATA-D Trial Lavallo-Gonzalez FJ 2013 | G     | NCT01106677 | Low risk | Low risk | TB   | Low risk  | Low risk | Low risk | Low risk  |
| Kadowaki T 2013                          | G     | NCT01026194 | Low risk | Low risk | QB   | Low risk  | Low risk | Low risk | High risk |
| MARLINA-T2D study Groop 2015             | G     | NCT01792518 | Low risk | Low risk | DB   | Low risk  | Low risk | Low risk | High risk |
| NCT00121667 2014                         | G     | NCT00121667 | Low risk | Low risk | DB   | Low risk  | Low risk | Low risk | High risk |
| NCT00998881 2014                         | G     | NCT00998881 | Low risk | Low risk | QB   | Low risk  | Low risk | Low risk | High risk |
| NCT01215097 2013                         | G     | NCT01215097 | Low risk | Low risk | DB   | Low risk  | Low risk | Low risk | High risk |
| DURATION-4 Russell-Jones D 2012          | GH    | NCT00676338 | Low risk | Low risk | DB   | unclear   | Low risk | Low risk | High risk |
| GetGoal-S Rosenstock J 2014              | GHR   | NCT00713830 | Low risk | Low risk | DB   | Low risk  | Low risk | Low risk | High risk |
| HARMONY-3 Ahren B 2014                   | R     | NCT00838903 | Low risk | Low risk | DB   | Low risk  | Low risk | Low risk | High risk |
| Kadowaki T 2011                          | G     | NCT00577824 | Low risk | Low risk | DB   | Low risk  | Low risk | Low risk | High risk |
| Kaku K 2016                              | G     | NCT01512108 | Low risk | Low risk | open | High risk | unclear  | Low risk | High risk |
| Seino Y 2010                             | GR    | NCT00393718 | Low risk | Low risk | DB   | Low risk  | Low risk | Low risk | High risk |
| Arechavaleta R 2009                      | P     | NCT00701090 | Low risk | Low risk | DB   | Low risk  | Low risk | Low risk | High risk |
| Arjona Ferreira JC 2013                  | P     | NCT00509262 | Low risk | Low risk | TB   | Low risk  | Low risk | Low risk | High risk |
| Barnett AH 2013                          | P     | NCT00757588 | Low risk | Low risk | DB   | Low risk  | Low risk | Low risk | High risk |
| Charbonnel B 2006                        | HP    | NCT00086515 | Low risk | Low risk | DB   | Low risk  | Low risk | Low risk | High risk |
| Frederich R 2012                         | P     | NCT00316082 | Low risk | Low risk | DB   | Low risk  | Low risk | Low risk | High risk |
| Goldstein BJ 2007-pc1                    | P     | NCT00103857 | Low risk | Low risk | DB   | Low risk  | Low risk | Low risk | High risk |
| Goldstein BJ 2007-pc2                    | P     | NCT00103857 | Low risk | Low risk | DB   | Low risk  | Low risk | Low risk | High risk |
| Goldstein BJ 2007-pc3                    | P     | NCT00103857 | Low risk | Low risk | DB   | Low risk  | Low risk | Low risk | High risk |
| Jadzinsky M 2009                         | P     | NCT00327015 | Low risk | Low risk | DB   | Low risk  | Low risk | Low risk | High risk |
| NCT01183013 2014                         | CP    | NCT01183013 | Low risk | Low risk | DB   | Low risk  | Low risk | Low risk | High risk |
| NCT01519674 2014                         | P     | NCT01519674 | Low risk | unclear  | open | High risk | Low risk | Low risk | High risk |
| TECOS Green JB 2015                      | CGHPR | NCT00790205 | Low risk | Low risk | DB   | Low risk  | Low risk | Low risk | High risk |
| Violante R 2012                          | P     | NCT00870194 | Low risk | Low risk | DB   | Low risk  | Low risk | Low risk | High risk |
| AWARD-1 Wysham C 2014                    | P     | NCT01064687 | Low risk | Low risk | QB   | Low risk  | Low risk | Low risk | High risk |
| DUAL-I Holst JJ 2016                     | P     | NCT01336023 | Low risk | unclear  | open | High risk | Low risk | Low risk | High risk |
| Diamant M 2014                           | PR    | NCT00960661 | Low risk | unclear  | open | High risk | Low risk | Low risk | High risk |
| EAGLE D'Alessio D 2015                   | P     | NCT01117350 | Low risk | unclear  | open | High risk | Low risk | Low risk | High risk |
| GetGoal-F1 Bolli G 2013                  | P     | NCT00763451 | Low risk | Low risk | DB   | Low risk  | Low risk | Low risk | High risk |
| GetGoal-L Riddle MC 2013                 | P     | NCT00715624 | Low risk | Low risk | QB   | Low risk  | Low risk | Low risk | High risk |
| GetGoal-M Ahren B 2013                   | PR    | NCT00712673 | Low risk | Low risk | DB   | Low risk  | Low risk | Low risk | High risk |

|                             |       |               |          |          |         |           |          |          |          |           |
|-----------------------------|-------|---------------|----------|----------|---------|-----------|----------|----------|----------|-----------|
| HARMONY-5 Home PD 2015      | PR    | NCT00839527   | Low risk | Low risk | DB      | Low risk  | Low risk | Low risk | Low risk | High risk |
| LixiLan-O Davies MJ, 2017   | P     | NCT02058147   | Low risk | Low risk | open    | High risk | Low risk | Low risk | Low risk | High risk |
| SUSTAIN-6 Marso SP 2016     | CGHPR | NCT01720446   | Low risk | Low risk | DB      | Low risk  | Low risk | Low risk | Low risk | High risk |
| Terauchi Y 2014             | P     | NCT01001104   | Low risk | Low risk | TB      | Low risk  | Low risk | Low risk | Low risk | High risk |
| Matthaei S 2016             | H     | NCT01619059   | Low risk | Low risk | TB      | Low risk  | Low risk | Low risk | Low risk | High risk |
| AWARD-9 Pozzilli P 2017     | H     | NCT02152371   | Low risk | Low risk | DB      | Low risk  | Low risk | Low risk | Low risk | High risk |
| SCALE Davies MJ 2015        | HR    | NCT01272232   | Low risk | Low risk | DB      | Low risk  | Low risk | Low risk | Low risk | High risk |
| L-STEP Fujitani Y 2016      | R     | UMIN000008591 | Low risk | unclear  | unclear | unclear   | Low risk | unclear  | unclear  | High risk |
| Vilsboll T 2010             | R     | NCT00395343   | Low risk | Low risk | DB      | Low risk  | Low risk | Low risk | Low risk | High risk |
| AWARD-4 Blonde L 2015       | R     | NCT01191268   | Low risk | Low risk | open    | High risk | Low risk | Low risk | Low risk | High risk |
| GetGoal-L-Asia Seino Y 2012 | R     | NCT00866658   | Low risk | Low risk | DB      | Low risk  | Low risk | Low risk | Low risk | High risk |

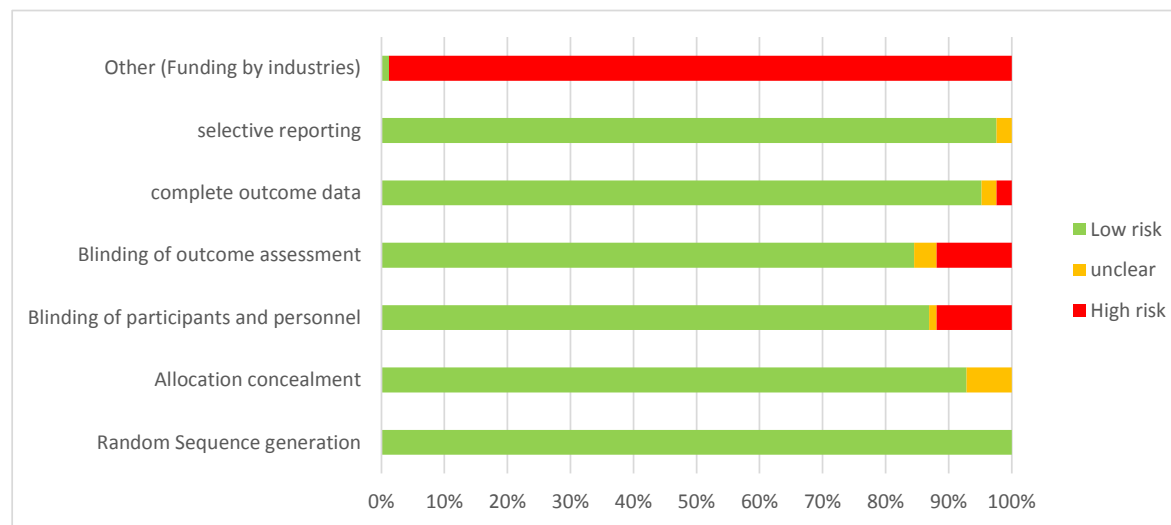

Supplement: bmjdrc-2019-000728supp004.pdf [file bmjdrc-2019-000728supp004.pdf]
