# Supplementary material for: Effect of incretin-based therapies on cancers of digestive system among 101 595 patients with type 2 diabetes mellitus: a systematic review and network meta-analysis combining 84 trials with a median duration of 30 weeks
Source: PubMed Central journal article supplement — BMJ Open Diabetes Res Care. 2019 Sep 20;7(1):e000728. doi: 10.1136/bmjdrc-2019-000728 (PMC6777405; doi:10.1136/bmjdrc-2019-000728), 2019-09-20
Supplement: bmjdrc-2019-000728supp001.pdf [file bmjdrc-2019-000728supp001.pdf]

## PROSPERO International prospective register of systematic reviews

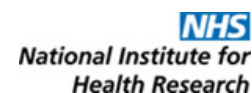

Incretin-based treatments and cancers of digestive system among patients with type 2 diabetes mellitus: a systematic review and network meta-analysis  
*Sanbao Chai, Shuqing Yu, Zhirong Yang, Shanshan Wu, Le Gao, Haining Wang, Yuan Zhang, Siyan Zhan, Linong Ji, Feng Sun*

### Citation

Sanbao Chai, Shuqing Yu, Zhirong Yang, Shanshan Wu, Le Gao, Haining Wang, Yuan Zhang, Siyan Zhan, Linong Ji, Feng Sun. Incretin-based treatments and cancers of digestive system among patients with type 2 diabetes mellitus: a systematic review and network meta-analysis. PROSPERO 2019 CRD42019123457 Available from: [http://www.crd.york.ac.uk/PROSPERO/display\\_record.php?ID=CRD42019123457](http://www.crd.york.ac.uk/PROSPERO/display_record.php?ID=CRD42019123457)

### Review question

To evaluate the risk of cancers of digestive system with incretin-based therapies among patients with type 2 diabetes mellitus.

### Searches

MEDLINE, EMBASE and the Cochrane Library were searched from inception through June 23rd, 2017. The limited language is English.

The following search strategy for Ovid-MEDLINE was adapted for other databases:

- 1.exp (DPP-4 inhibitors or dipeptidyl peptidase 4 inhibitor or glucagon-like peptide-1 agonists)/
- 2.(DPP-4 or dipeptidyl peptidase 4 or glucagon like peptide\* or GLP-1).tw.
- 3.(exenatide or liraglutide or albiglutide or taspoglutide or lixisenatide or dulaglutide).tw.
- 4.(Victoza or Byetta or Bydureon).tw
- 5.(januvia or juvisync or janumet or galvus or equatablets or eucreas or onglyza or kombiglyzexr or nesina or liovel or ondero or jentadueto).tw.
- 6.(sitagliptin or vildagliptin or saxagliptin or alogliptin or linagliptin or teneligliptin or anagliptin or gemigliptin or trelagliptin).tw.
- 7.randomized controlled trial.pt.
- 8.(randomized or randomised).tw.
- 9.(diabetes mellitus, type 2).sh.
- 10.(1 or 2 or 3 or 4 or 5 or 6) and (7 or 8) and 9

### Types of study to be included

Randomized controlled clinical trials

### Condition or domain being studied

Incretins are gut peptides which can augment nutrient-stimulated insulin secretion after dietary intake. Incretin-based therapies include incretin mimetics of glucagon-like peptide-1 receptor agonists and incretin enhancers of dipeptidyl peptidase 4 inhibitors. With the widespread use of these drugs, there are concerns about the safety of the digestive tract. Clinical studies completed thus far are insufficient to confirm or exclude an increased long-term risk of cancers of digestive system with incretin-based therapies. Therefore,

## PROSPERO International prospective register of systematic reviews

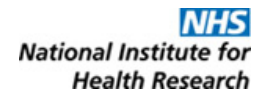

we conducted a meta-analysis by investigating all randomized controlled clinical trials to evaluate cancer risk of digestive system related with incretin-based therapies in patients with type 2 diabetes mellitus.

### Participants/population

Patients with type 2 diabetes mellitus. There are no other restrictions.

### Intervention(s), exposure(s)

Analysis of gastrointestinal tumors in all randomized controlled clinical trials studies involving incretin-based therapy.

### Comparator(s)/control

Placebo and other traditional anti-diabetic drugs (e.g. Metformin, Insulin, Sulfonylurea, gliazolidinediones and so on).

### Context

#### Main outcome(s)

Incidence of gastrointestinal tumors

*Timing and effect measures*

#### Additional outcome(s)

None

*Timing and effect measures*

### Data extraction (selection and coding)

Three investigators will extract data independently in duplicate. Any disagreement will be resolved by consensus. The data being extracted will include the incidence of gastrointestinal tumors and the baseline characteristics of the study to be included.

### Risk of bias (quality) assessment

Risk of bias of included studies was assessed according to Cochrane risk of bias tool.

### Strategy for data synthesis

Quantitative synthesis based on aggregate data is planned. For traditional meta-analysis, the pooled OR and 95% confidence interval (95% CI) of incidence of digestive system cancer will be calculated by random-effects model.  $I^2$  is used to describe the heterogeneity between pair-wise comparisons. For network meta-analysis, we will use the frequentist framework to perform a random effect network meta-analysis. Pooled OR and 95% CI will be also summarized. Next we will estimate the ranking probabilities of each treatment being at order. To assess the publication bias, a comparison-adjusted funnel plot will be used to detect the small-study effects. Finally, we will check the assumptions in the NMA including inconsistency and heterogeneity. We will use STATA 13.1 and R 3.5.0 software for the above analysis.

### Analysis of subgroups or subsets

We will conduct meta-regression by baseline FPG, age, BMI and so on.

### Contact details for further information

Sanbao Chai  
chaisb@126.com

### Organisational affiliation of the review

Peking University International Hospital

### Review team members and their organisational affiliations

Dr Sanbao Chai. Peking University International Hospital  
Ms Shuqing Yu. Department of Epidemiology and Biostatistics, School of Public Health, Peking University Health Science Centre  
Ms Zhirong Yang. Primary Care Unit, School of Clinical Medicine, University of Cambridge

## PROSPERO

### International prospective register of systematic reviews

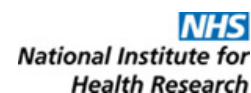

Dr Shanshan Wu. National Clinical Research Center of Digestive Disease, Beijing Friendship Hospital, Capital Medical University  
Ms Le Gao. Department of Epidemiology and Biostatistics, School of Public Health, Peking University Health Science Centre  
Professor Haining Wang. Department of Endocrinology and Metabolism, Peking University Third Hospital  
Dr Yuan Zhang. Department of Clinical Epidemiology and Biostatistics, McMaster University  
Professor Siyan Zhan. Department of Epidemiology and Biostatistics, School of Public Health, Peking University Health Science Centre  
Professor Linong Ji. Department of Endocrinology and Metabolism, Peking University People's Hospital  
Professor Feng Sun. Department of Epidemiology and Biostatistics, School of Public Health, Peking University Health Science Centre

#### Anticipated or actual start date

23 May 2018

#### Anticipated completion date

31 March 2019

#### Funding sources/sponsors

The National Natural Science Foundation of China (81302508, 71673003)

The Medical Research Foundation of Peking University International Hospital (YN2016QN05)

#### Conflicts of interest

#### Language

English

#### Country

China

#### Stage of review

Review\_Ongoing

#### Subject index terms status

Subject indexing assigned by CRD

#### Subject index terms

Diabetes Mellitus, Type 2; Digestive System; Humans; Incretins; Neoplasms; Network Meta-Analysis

#### Date of registration in PROSPERO

29 March 2019

#### Date of publication of this version

29 March 2019

#### Details of any existing review of the same topic by the same authors

#### Stage of review at time of this submission

**PROSPERO**  
International prospective register of systematic reviews

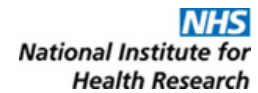

| Stage                                                           | Started | Completed |
|-----------------------------------------------------------------|---------|-----------|
| Preliminary searches                                            | Yes     | Yes       |
| Piloting of the study selection process                         | Yes     | Yes       |
| Formal screening of search results against eligibility criteria | Yes     | Yes       |
| Data extraction                                                 | Yes     | No        |
| Risk of bias (quality) assessment                               | No      | No        |
| Data analysis                                                   | No      | No        |

**Versions**

29 March 2019

**PROSPERO**

This information has been provided by the named contact for this review. CRD has accepted this information in good faith and registered the review in PROSPERO. CRD bears no responsibility or liability for the content of this registration record, any associated files or external websites.
