# Supplementary material for: Effect of incretin-based therapies on cancers of digestive system among 101 595 patients with type 2 diabetes mellitus: a systematic review and network meta-analysis combining 84 trials with a median duration of 30 weeks
Source: PubMed Central journal article supplement — BMJ Open Diabetes Res Care. 2019 Sep 20;7(1):e000728. doi: 10.1136/bmjdrc-2019-000728 (PMC6777405; doi:10.1136/bmjdrc-2019-000728), 2019-09-20
Supplement: bmjdrc-2019-000728supp002.pdf [file bmjdrc-2019-000728supp002.pdf]

## Appendix 2 Search strategy and results

Table 1 Number of citations by each database and trial register searched

| Databases and trial registers | Citations |
|-------------------------------|-----------|
| Databases                     |           |
| Medline                       | 5103      |
| Embase                        | 8648      |
| Cochrane Library              | 2122      |
| Total databases               | 15873     |
| Trial registers               |           |
| ClinicalTrials.gov            | 446       |
| Total trial registers         | 446       |

Table 2 Search strategy for Ovid-Medline

|    |                                                                                                                                  |
|----|----------------------------------------------------------------------------------------------------------------------------------|
| 1  | *Glucagon-Like Peptide-1 Receptor/ or glucagon-like peptide-1 agonists.mp. or<br>*Glucagon-Like Peptide 1/                       |
| 2  | glucagon like peptide*.ti,ab.                                                                                                    |
| 3  | Receptors, Glucagon/ag [Agonists]                                                                                                |
| 4  | exenatide.af.                                                                                                                    |
| 5  | liraglutide.af.                                                                                                                  |
| 6  | albiglutide.af.                                                                                                                  |
| 7  | tasoglutide.af.                                                                                                                  |
| 8  | lixisenatide.af.                                                                                                                 |
| 9  | dulaglutide.af.                                                                                                                  |
| 10 | semaglutide.af.                                                                                                                  |
| 11 | Byetta.af.                                                                                                                       |
| 12 | Bydureon.af.                                                                                                                     |
| 13 | Victoza.af.                                                                                                                      |
| 14 | Lyxumia.af.                                                                                                                      |
| 15 | Adlyxin.af.                                                                                                                      |
| 16 | Tanzeum.af.                                                                                                                      |
| 17 | Eperzan.af.                                                                                                                      |
| 18 | Trulicity.af.                                                                                                                    |
| 19 | ZP10A peptide*.af.                                                                                                               |
| 20 | "AVE 0010".af.                                                                                                                   |
| 21 | GLP 1 Receptor Agonist*.af.                                                                                                      |
| 22 | GLP 1 RA*.af.                                                                                                                    |
| 23 | GLP 1RA*.af.                                                                                                                     |
| 24 | 1 or 2 or 3 or 4 or 5 or 6 or 7 or 8 or 9 or 10 or 11 or 12 or 13 or 14 or 15 or 16 or 17 or 18<br>or 19 or 20 or 21 or 22 or 23 |
| 25 | Dipeptidyl Peptidase 4 inhibitor.mp. or exp *Dipeptidyl-Peptidase IV Inhibitors/                                                 |
| 26 | dipeptidyl peptidase IV inhibit*.af.                                                                                             |
| 27 | Dipeptidyl Peptidase 4 Inhibit*.af.                                                                                              |
| 28 | DPP 4 inhibit*.af.                                                                                                               |
| 29 | DPP4 inhibit*.af.                                                                                                                |
| 30 | DPP4i.af.                                                                                                                        |
| 31 | DPP IV inhibit*.af.                                                                                                              |
| 32 | DPPIV inhibit*.af.                                                                                                               |
| 33 | sitagliptin.af.                                                                                                                  |
| 34 | Januvia.af.                                                                                                                      |
| 35 | Janumet.af.                                                                                                                      |
| 36 | Juvisync.af.                                                                                                                     |
| 37 | vildagliptin.af.                                                                                                                 |
| 38 | Galvus.af.                                                                                                                       |

|    |                                                                                                             |
|----|-------------------------------------------------------------------------------------------------------------|
| 39 | Eucreas.af.                                                                                                 |
| 40 | Galvus Met.af.                                                                                              |
| 41 | saxagliptin.af.                                                                                             |
| 42 | Onglyza.af.                                                                                                 |
| 43 | Kombiglyze XR.af.                                                                                           |
| 44 | alogliptin.af.                                                                                              |
| 45 | Nesina.af.                                                                                                  |
| 46 | Oseni.af.                                                                                                   |
| 47 | Kazano.af.                                                                                                  |
| 48 | linagliptin.af.                                                                                             |
| 49 | Trajenta.af.                                                                                                |
| 50 | gemigliptin.af.                                                                                             |
| 51 | Gemiglo.af.                                                                                                 |
| 52 | anagliptin.af.                                                                                              |
| 53 | Beskoa.af.                                                                                                  |
| 54 | teneligliptin.af.                                                                                           |
| 55 | Tenelia.af.                                                                                                 |
| 56 | Trelagliptin.af.                                                                                            |
| 57 | PF 734200.af.                                                                                               |
| 58 | retagliptin.af.                                                                                             |
| 59 | Melogliptin.af.                                                                                             |
| 60 | evogliptin.af.                                                                                              |
| 61 | Carmegliptin.af.                                                                                            |
| 62 | "LC15 0444".af.                                                                                             |
| 63 | DA-1229.af.                                                                                                 |
| 64 | omarigliptin.af.                                                                                            |
| 65 | gliptin*.af.                                                                                                |
| 66 | dutogliptin.af.                                                                                             |
| 67 | or/25-66                                                                                                    |
| 68 | 24 or 67                                                                                                    |
| 69 | (clinical trial or controlled clinical trial or randomized controlled trial).pt.                            |
| 70 | clinical trials.mp. or exp *Clinical Trial/                                                                 |
| 71 | clinical trials as topic/ or controlled clinical trials as topic/ or randomized controlled trials as topic/ |
| 72 | random*.ti,ab.                                                                                              |
| 73 | clinical trial*.ti,ab.                                                                                      |
| 74 | controlled trial*.ti,ab.                                                                                    |
| 75 | case-control studies/                                                                                       |
| 76 | retrospective studies/                                                                                      |
| 77 | cohort studies/                                                                                             |
| 78 | longitudinal studies/                                                                                       |

|     |                          |
|-----|--------------------------|
| 79  | follow-up studies/       |
| 80  | prospective studies/     |
| 81  | cohort.ti,ab.            |
| 82  | longitudinal.ti,ab.      |
| 83  | follow up.ti,ab.         |
| 84  | followup.ti,ab.          |
| 85  | prospective*.ti,ab.      |
| 86  | retrospective*.ti,ab.    |
| 87  | nonrandom*.ti,ab.        |
| 88  | comparison group*.ti,ab. |
| 89  | control group*.ti,ab.    |
| 90  | database*.ti,ab.         |
| 91  | population*.ti,ab.       |
| 92  | registries/              |
| 93  | registries.ti,ab.        |
| 94  | trial\$1 register.ti.    |
| 95  | trial\$1 registers.ti.   |
| 96  | or/69-95                 |
| 97  | 24 and 96                |
| 98  | 67 and 96                |
| 99  | 68 and 96                |
| 100 | limit 97 to humans       |
| 101 | limit 97 to animals      |
| 102 | 101 not 100              |
| 103 | 97 not 102               |
| 104 | limit 98 to humans       |
| 105 | limit 98 to animals      |
| 106 | 105 not 104              |
| 107 | 98 not 106               |
| 108 | limit 99 to humans       |
| 109 | limit 99 to animals      |
| 110 | 109 not 108              |
| 111 | 99 not 110               |
| 112 | 103 or 107               |
| 113 | meta analysis.pt.        |
| 114 | Meta-Analysis as Topic/  |
| 115 | meta analy*.ti.          |
| 116 | metaanaly*.ti.           |
| 117 | 113 or 114 or 115 or 116 |
| 118 | 24 and 117               |
| 119 | 67 and 117               |

|     |                            |
|-----|----------------------------|
| 120 | 68 and 117                 |
| 121 | limit 118 to humans        |
| 122 | limit 118 to animals       |
| 123 | 122 not 121                |
| 124 | 118 not 123                |
| 125 | limit 119 to humans        |
| 126 | limit 119 to animals       |
| 127 | 126 not 125                |
| 128 | 119 not 127                |
| 129 | limit 120 to humans        |
| 130 | limit 120 to animals       |
| 131 | 130 not 129                |
| 132 | 120 not 131                |
| 133 | 103 not 124                |
| 134 | 107 not 128                |
| 135 | 111 not 132                |
| 136 | 133 or 134                 |
| 137 | remove duplicates from 133 |
| 138 | remove duplicates from 134 |
| 139 | Remove duplicates from 135 |

Table3 Search strategy for Embase

|     |                                                                                                                                        |
|-----|----------------------------------------------------------------------------------------------------------------------------------------|
| #1  | 'glucagon like peptide'/exp                                                                                                            |
| #2  | 'glucagon like peptide 1'/exp                                                                                                          |
| #3  | 'glp-1 receptor agonists'                                                                                                              |
| #4  | 'glucagon like peptide 1 receptor agonists'                                                                                            |
| #5  | 'glucagon receptor'/exp                                                                                                                |
| #6  | 'glucagon-like peptide-1 agonists'                                                                                                     |
| #7  | 'glp-1 receptor agonist'                                                                                                               |
| #8  | 'glucagon like peptide 1 receptor agonist'                                                                                             |
| #9  | 'glp-1 agonist'                                                                                                                        |
| #10 | 'glp-1 agonists'                                                                                                                       |
| #11 | 'glp-1 ra*'                                                                                                                            |
| #12 | 'exenatide'/exp                                                                                                                        |
| #13 | 'liraglutide'/exp                                                                                                                      |
| #14 | 'albiglutide'/exp                                                                                                                      |
| #15 | 'tasoglutide'/exp                                                                                                                      |
| #16 | 'lixisenatide'/exp                                                                                                                     |
| #17 | 'dulaglutide'/exp                                                                                                                      |
| #18 | 'semaglutide'/exp                                                                                                                      |
| #19 | 'zp10a peptide'                                                                                                                        |
| #20 | 'zp10a peptide 1'                                                                                                                      |
| #21 | 'glp1 ra'                                                                                                                              |
| #22 | #1 OR #2 OR #3 OR #4 OR #5 OR #6 OR #7 OR #8 OR #9 OR #10 OR #11 OR #12 OR #13 OR #14 OR #15 OR #16 OR #17 OR #18 OR #19 OR #20 OR #21 |
| #23 | 'dipeptidyl peptidase iv inhibitor'                                                                                                    |
| #24 | 'dipeptidyl peptidase iv inhibitors'                                                                                                   |
| #25 | 'dipeptidyl peptidase iv inhibitor'/exp                                                                                                |
| #26 | 'dpp 4 inhibitor*'                                                                                                                     |
| #27 | 'dpp iv inhibitor*'                                                                                                                    |
| #28 | 'dpp4i'                                                                                                                                |
| #29 | 'dpp4 i'                                                                                                                               |
| #30 | 'dpp4 inhibitor*'                                                                                                                      |
| #31 | 'dppiv inhibitor*'                                                                                                                     |
| #32 | 'alogliptin'/exp                                                                                                                       |
| #33 | 'sitagliptin'/exp                                                                                                                      |
| #34 | 'gemigliptin'/exp                                                                                                                      |
| #35 | 'linagliptin'/exp                                                                                                                      |
| #36 | 'saxagliptin'/exp                                                                                                                      |
| #37 | 'vildagliptin'/exp                                                                                                                     |
| #38 | 'dutogliptin'/exp                                                                                                                      |
| #39 | 'teneligliptin'/exp                                                                                                                    |
| #40 | 'anagliptin'/exp                                                                                                                       |
| #41 | 'trelagliptin'/exp                                                                                                                     |

|     |                                                                                                                                                                                                                                                                                                                                                                                                                                                                   |
|-----|-------------------------------------------------------------------------------------------------------------------------------------------------------------------------------------------------------------------------------------------------------------------------------------------------------------------------------------------------------------------------------------------------------------------------------------------------------------------|
| #42 | 'pf-734200'/exp                                                                                                                                                                                                                                                                                                                                                                                                                                                   |
| #43 | 'melogliptin'/exp                                                                                                                                                                                                                                                                                                                                                                                                                                                 |
| #44 | 'evogliptin'/exp                                                                                                                                                                                                                                                                                                                                                                                                                                                  |
| #45 | 'retagliptin'                                                                                                                                                                                                                                                                                                                                                                                                                                                     |
| #46 | 'carmegliptin'/exp                                                                                                                                                                                                                                                                                                                                                                                                                                                |
| #47 | 'lc15 0444'                                                                                                                                                                                                                                                                                                                                                                                                                                                       |
| #48 | 'tenelia'                                                                                                                                                                                                                                                                                                                                                                                                                                                         |
| #49 | 'da-1229'                                                                                                                                                                                                                                                                                                                                                                                                                                                         |
| #50 | 'omarigliptin'/exp                                                                                                                                                                                                                                                                                                                                                                                                                                                |
| #51 | 'beskoa'                                                                                                                                                                                                                                                                                                                                                                                                                                                          |
| #52 | 'gemiglo'                                                                                                                                                                                                                                                                                                                                                                                                                                                         |
| #53 | 'trajenta'                                                                                                                                                                                                                                                                                                                                                                                                                                                        |
| #54 | 'kazano'                                                                                                                                                                                                                                                                                                                                                                                                                                                          |
| #55 | 'oseni'                                                                                                                                                                                                                                                                                                                                                                                                                                                           |
| #56 | 'nesina'                                                                                                                                                                                                                                                                                                                                                                                                                                                          |
| #57 | 'kombiglyze xr'                                                                                                                                                                                                                                                                                                                                                                                                                                                   |
| #58 | 'onglyza'                                                                                                                                                                                                                                                                                                                                                                                                                                                         |
| #59 | 'eucreas'                                                                                                                                                                                                                                                                                                                                                                                                                                                         |
| #60 | 'galvus'                                                                                                                                                                                                                                                                                                                                                                                                                                                          |
| #61 | 'juvisync'                                                                                                                                                                                                                                                                                                                                                                                                                                                        |
| #62 | 'janumet'                                                                                                                                                                                                                                                                                                                                                                                                                                                         |
| #63 | 'januvia'                                                                                                                                                                                                                                                                                                                                                                                                                                                         |
| #64 | 'liptin'                                                                                                                                                                                                                                                                                                                                                                                                                                                          |
| #65 | 'gliptin'/exp                                                                                                                                                                                                                                                                                                                                                                                                                                                     |
| #66 | #23 OR #24 OR #25 OR #26 OR #27 OR #28 OR #29 OR #30 OR #31 OR #32 OR #33 OR #34 OR #35 OR #36 OR #37 OR #38 OR #39 OR #40 OR #41 OR #42 OR #43 OR #44 OR #45 OR #46 OR #47 OR #48 OR #49 OR #50 OR #51 OR #52 OR #53 OR #54 OR #55 OR #56 OR #57 OR #58 OR #59 OR #60 OR #61 OR #62 OR #63 OR #64 OR #65                                                                                                                                                         |
| #67 | #1 OR #2 OR #3 OR #4 OR #5 OR #6 OR #7 OR #8 OR #9 OR #10 OR #11 OR #12 OR #13 OR #14 OR #15 OR #16 OR #17 OR #18 OR #19 OR #20 OR #21 OR #22 OR #23 OR #24 OR #25 OR #26 OR #27 OR #28 OR #29 OR #30 OR #31 OR #32 OR #33 OR #34 OR #35 OR #36 OR #37 OR #38 OR #39 OR #40 OR #41 OR #42 OR #43 OR #44 OR #45 OR #46 OR #47 OR #48 OR #49 OR #50 OR #51 OR #52 OR #53 OR #54 OR #55 OR #56 OR #57 OR #58 OR #59 OR #60 OR #61 OR #62 OR #63 OR #64 OR #65 OR #66 |
| #68 | 'clinical trial'/exp OR 'controlled clinical trial'/exp OR 'randomized controlled trial'/exp                                                                                                                                                                                                                                                                                                                                                                      |
| #69 | random*                                                                                                                                                                                                                                                                                                                                                                                                                                                           |
| #70 | 'case-control studies'/exp                                                                                                                                                                                                                                                                                                                                                                                                                                        |
| #71 | 'retrospective studies'/exp                                                                                                                                                                                                                                                                                                                                                                                                                                       |
| #72 | 'cohort studies'/exp                                                                                                                                                                                                                                                                                                                                                                                                                                              |
| #73 | 'longitudinal studies'/exp                                                                                                                                                                                                                                                                                                                                                                                                                                        |

|      |                                                                                                          |
|------|----------------------------------------------------------------------------------------------------------|
| #74  | 'follow up studies'/exp                                                                                  |
| #75  | nonrandom                                                                                                |
| #76  | 'prospective studies'/exp                                                                                |
| #77  | 'comparison group'                                                                                       |
| #78  | 'control group'/exp                                                                                      |
| #79  | database*                                                                                                |
| #80  | 'database'/exp                                                                                           |
| #81  | 'registries'/exp                                                                                         |
| #82  | 'registration'/exp                                                                                       |
| #83  | #68 OR #69 OR #70 OR #71 OR #72 OR #73 OR #74 OR #75 OR #76 OR #77 OR #78 OR #79 OR #80 OR #81 OR #82    |
| #84  | #22 AND #83                                                                                              |
| #85  | #22 AND #83 AND [humans]/lim                                                                             |
| #86  | #22 AND #83 AND [animals]/lim                                                                            |
| #87  | #86 NOT #85                                                                                              |
| #88  | #84 NOT #87                                                                                              |
| #89  | #66 AND #83                                                                                              |
| #90  | #66 AND #83 AND [humans]/lim                                                                             |
| #91  | #66 AND #83 AND [animals]/lim                                                                            |
| #92  | #91 NOT #90                                                                                              |
| #93  | #89 NOT #92                                                                                              |
| #94  | #67 AND #83                                                                                              |
| #95  | #67 AND #83 AND [humans]/lim                                                                             |
| #96  | #67 AND #83 AND [animals]/lim                                                                            |
| #97  | #96 NOT #95                                                                                              |
| #98  | #94 NOT #97                                                                                              |
| #99  | #88 AND ([article]/lim OR [article in press]/lim OR [conference abstract]/lim OR [conference paper]/lim) |
| #100 | #93 AND ([article]/lim OR [article in press]/lim OR [conference abstract]/lim OR [conference paper]/lim) |
| #101 | #98 AND ([article]/lim OR [article in press]/lim OR [conference abstract]/lim OR [conference paper]/lim) |
| #102 | #99 AND [embase]/lim                                                                                     |
| #103 | #100 AND [embase]/lim                                                                                    |
| #104 | #101 AND [embase]/lim                                                                                    |



Table4 Search strategy for Cochrane Library

|     |                                                                                                                                                                                                 |                                                                                                                                                                                                                                                                                                                                                                                                                                                               |
|-----|-------------------------------------------------------------------------------------------------------------------------------------------------------------------------------------------------|---------------------------------------------------------------------------------------------------------------------------------------------------------------------------------------------------------------------------------------------------------------------------------------------------------------------------------------------------------------------------------------------------------------------------------------------------------------|
| S45 | s42                                                                                                                                                                                             | Limiters - MEDLINE Publication Type: Multicenter Study, Randomized Controlled Trial, Validation Studies, Clinical Conference, Clinical Trial, Clinical Trial, Phase I, Clinical Trial, Phase II, Clinical Trial, Phase III, Clinical Trial, Phase IV, Congresses, Consensus Development Conference, Controlled Clinical Trial, Corrected and Republished Article, Duplicate Publication, Evaluation Studies, Journal Article<br>Search modes - Boolean/Phrase |
| S44 | s17                                                                                                                                                                                             | Limiters - MEDLINE Publication Type: Multicenter Study, Randomized Controlled Trial, Validation Studies, Clinical Conference, Clinical Trial, Clinical Trial, Phase I, Clinical Trial, Phase II, Clinical Trial, Phase III, Clinical Trial, Phase IV, Congresses, Consensus Development Conference, Controlled Clinical Trial, Corrected and Republished Article, Duplicate Publication, Evaluation Studies, Journal Article<br>Search modes - Boolean/Phrase |
| S43 | S41                                                                                                                                                                                             | Limiters - MEDLINE Publication Type: Multicenter Study, Randomized Controlled Trial, Validation Studies, Clinical Conference, Clinical Trial, Clinical Trial, Phase I, Clinical Trial, Phase II, Clinical Trial, Phase III, Clinical Trial, Phase IV, Congresses, Consensus Development Conference, Controlled Clinical Trial, Corrected and Republished Article, Duplicate Publication, Evaluation Studies, Journal Article<br>Search modes - Boolean/Phrase |
| S42 | S17 OR S41                                                                                                                                                                                      | Search modes - Boolean/Phrase                                                                                                                                                                                                                                                                                                                                                                                                                                 |
| S41 | S18 OR S19 OR S20 OR S21 OR S22 OR S23 OR S24 OR S25 OR S26 OR S27 OR S28 OR S29 OR S30 OR S31 OR S32 OR S33 OR S34 OR S35 OR S36 OR S37 OR S38 OR S39 OR S40                                   | Search modes - Boolean/Phrase                                                                                                                                                                                                                                                                                                                                                                                                                                 |
| S40 | TX Januvia OR TX Janumet OR TX Juvisync OR TX Galvus OR TX Eucreas OR TX Onglyza OR TX Kombiglyze OR TX Nesina OR TX Oseni OR TX Kazano OR TX Trajenta OR TX Gemiglo OR TX Beskoa OR TX Tenelia | Search modes - Boolean/Phrase                                                                                                                                                                                                                                                                                                                                                                                                                                 |
| S39 | TX Carmegliptin                                                                                                                                                                                 | Search modes - Boolean/Phrase                                                                                                                                                                                                                                                                                                                                                                                                                                 |
| S38 | TX Evogliptin                                                                                                                                                                                   | Search modes - Boolean/Phrase                                                                                                                                                                                                                                                                                                                                                                                                                                 |
| S37 | TX Melogliptin                                                                                                                                                                                  | Search modes - Boolean/Phrase                                                                                                                                                                                                                                                                                                                                                                                                                                 |
| S36 | TX Retagliptin                                                                                                                                                                                  | Search modes - Boolean/Phrase                                                                                                                                                                                                                                                                                                                                                                                                                                 |

|     |                                                                                                                                                                                                                                                                                                                                                                                                                        |                               |
|-----|------------------------------------------------------------------------------------------------------------------------------------------------------------------------------------------------------------------------------------------------------------------------------------------------------------------------------------------------------------------------------------------------------------------------|-------------------------------|
| S35 | TX PF-734200                                                                                                                                                                                                                                                                                                                                                                                                           | Search modes - Boolean/Phrase |
| S34 | TX Trelagliptin                                                                                                                                                                                                                                                                                                                                                                                                        | Search modes - Boolean/Phrase |
| S33 | TX anagliptin                                                                                                                                                                                                                                                                                                                                                                                                          | Search modes - Boolean/Phrase |
| S32 | TX gemigliptin                                                                                                                                                                                                                                                                                                                                                                                                         | Search modes - Boolean/Phrase |
| S31 | TX LC15 0444                                                                                                                                                                                                                                                                                                                                                                                                           | Search modes - Boolean/Phrase |
| S30 | TX teneligliptin                                                                                                                                                                                                                                                                                                                                                                                                       | Search modes - Boolean/Phrase |
| S29 | TX dutogliptin                                                                                                                                                                                                                                                                                                                                                                                                         | Search modes - Boolean/Phrase |
| S28 | TX linagliptin                                                                                                                                                                                                                                                                                                                                                                                                         | Search modes - Boolean/Phrase |
| S27 | TX saxagliptin                                                                                                                                                                                                                                                                                                                                                                                                         | Search modes - Boolean/Phrase |
| S26 | TX vildagliptin                                                                                                                                                                                                                                                                                                                                                                                                        | Search modes - Boolean/Phrase |
| S25 | TX sitagliptin                                                                                                                                                                                                                                                                                                                                                                                                         | Search modes - Boolean/Phrase |
| S24 | TX alogliptin                                                                                                                                                                                                                                                                                                                                                                                                          | Search modes - Boolean/Phrase |
| S23 | TX DPP IV inhibit* OR TX DPPIV inhibit*                                                                                                                                                                                                                                                                                                                                                                                | Search modes - Boolean/Phrase |
| S22 | TX DPP4i                                                                                                                                                                                                                                                                                                                                                                                                               | Search modes - Boolean/Phrase |
| S21 | TX DPP 4 inhibit* OR TX DPP4 inhibit*                                                                                                                                                                                                                                                                                                                                                                                  | Search modes - Boolean/Phrase |
| S20 | TX dipeptidyl-peptidase 4 inhibitor OR TX dipeptidyl-peptidase 4 inhibitors                                                                                                                                                                                                                                                                                                                                            | Search modes - Boolean/Phrase |
| S19 | TX dipeptidyl-peptidase iv inhibitors OR TX dipeptidyl-peptidase iv inhibitor                                                                                                                                                                                                                                                                                                                                          | Search modes - Boolean/Phrase |
| S18 | (ZE "dipeptidyl-peptidase iv inhibitors") or (ZE "dipeptidyl-peptidase iv inhibitors administration & dosage") or (ZE "dipeptidyl-peptidase iv inhibitors adverse effects") or (ZE "dipeptidyl-peptidase iv inhibitors pharmacokinetics") or (ZE "dipeptidyl-peptidase iv inhibitors pharmacology") or (ZE "dipeptidyl-peptidase iv inhibitors therapeutic use") or (ZE "dipeptidyl-peptidase iv inhibitors toxicity") | Search modes - Boolean/Phrase |
| S17 | S1 OR S2 OR S3 OR S4 OR S5 OR S6 OR S7 OR S8 OR S9 OR S10 OR S11 OR S12 OR S13 OR S14 OR S15 OR S16                                                                                                                                                                                                                                                                                                                    | Search modes - Boolean/Phrase |

|     |                                                                                                                                                                                                                                                                                                                                                                                                                                                    |                               |
|-----|----------------------------------------------------------------------------------------------------------------------------------------------------------------------------------------------------------------------------------------------------------------------------------------------------------------------------------------------------------------------------------------------------------------------------------------------------|-------------------------------|
| S16 | TX Byetta OR TX Bydureon OR TX Victoza OR TX Lyxumia OR TX Adlyxin OR TX Tanzeum OR TX Eperzan OR TX Trulicity OR TX AVE 0010                                                                                                                                                                                                                                                                                                                      | Search modes - Boolean/Phrase |
| S15 | TX GLP 1RA*.                                                                                                                                                                                                                                                                                                                                                                                                                                       | Search modes - Boolean/Phrase |
| S14 | TX GLP 1 RA*.                                                                                                                                                                                                                                                                                                                                                                                                                                      | Search modes - Boolean/Phrase |
| S13 | TX GLP 1 Receptor Agonist*.                                                                                                                                                                                                                                                                                                                                                                                                                        | Search modes - Boolean/Phrase |
| S12 | TX ZP10A peptide*                                                                                                                                                                                                                                                                                                                                                                                                                                  | Search modes - Boolean/Phrase |
| S11 | TX semaglutide                                                                                                                                                                                                                                                                                                                                                                                                                                     | Search modes - Boolean/Phrase |
| S10 | TX dulaglutide                                                                                                                                                                                                                                                                                                                                                                                                                                     | Search modes - Boolean/Phrase |
| S9  | TX lixisenatide                                                                                                                                                                                                                                                                                                                                                                                                                                    | Search modes - Boolean/Phrase |
| S8  | TX taspoglutide                                                                                                                                                                                                                                                                                                                                                                                                                                    | Search modes - Boolean/Phrase |
| S7  | TX albiglutide                                                                                                                                                                                                                                                                                                                                                                                                                                     | Search modes - Boolean/Phrase |
| S6  | TX liraglutide                                                                                                                                                                                                                                                                                                                                                                                                                                     | Search modes - Boolean/Phrase |
| S5  | TX exenatide                                                                                                                                                                                                                                                                                                                                                                                                                                       | Search modes - Boolean/Phrase |
| S4  | S1 OR S2 OR S3                                                                                                                                                                                                                                                                                                                                                                                                                                     | Search modes - Boolean/Phrase |
| S3  | TX glp-1 OR TX glp1                                                                                                                                                                                                                                                                                                                                                                                                                                | Search modes - Boolean/Phrase |
| S2  | TX glucagon-like peptide 1 OR TX Glucagon-Like Peptides 1                                                                                                                                                                                                                                                                                                                                                                                          | Search modes - Boolean/Phrase |
| S1  | (ZE "glucagon-like peptide 1") or (ZE "glucagon-like peptide 1 administration & dosage") or (ZE "glucagon-like peptide 1 agonists") or (ZE "glucagon-like peptide 1 analogs & derivatives") or (ZE "glucagon-like peptide 1 drug effects") or (ZE "glucagon-like peptide 1 therapeutic use") or (ZE "glucagon-like peptide-1 receptor agonists") or (ZE "glucagon-like peptide 1 pharmacokinetics") or (ZE "glucagon-like peptide 1 pharmacology") | Search modes - Boolean/Phrase |

#### Search strategy for ClinicalTrials.gov

exenatide OR liraglutide OR albiglutide OR taspoglutide OR lixisenatide OR dulaglutide OR semaglutide OR Byetta OR Bydureon OR Victoza OR Lyxumia OR Adlyxin OR Tanzeum OR Eperzan OR Trulicity OR 'ZP10A peptide\*' OR 'AVE 0010' OR sitagliptin OR Januvia OR Janumet OR Juvisync OR vildagliptin OR Galvus OR Eucreas OR 'Galvus Met' OR saxagliptin

OR Onglyza OR 'Kombiglyze XR' OR alogliptin OR Nesina OR Oseni OR Kazano OR linagliptin OR Trajenta OR gemigliptin OR Gemiglo OR anagliptin OR Beskoa OR teneligliptin OR Tenelia OR Trelagliptin OR 'PF 734200' OR retagliptin OR Melogliptin OR evogliptin OR Carmegliptin OR "LC15 0444" OR 'DA-1229' OR omarigliptin OR gliptin\* OR dutogliptin
