# Supplementary material for: Effect of incretin-based therapies on cancers of digestive system among 101 595 patients with type 2 diabetes mellitus: a systematic review and network meta-analysis combining 84 trials with a median duration of 30 weeks
Source: PubMed Central journal article supplement — BMJ Open Diabetes Res Care. 2019 Sep 20;7(1):e000728. doi: 10.1136/bmjdrc-2019-000728 (PMC6777405; doi:10.1136/bmjdrc-2019-000728), 2019-09-20
Supplement: bmjdrc-2019-000728supp003.pdf [file bmjdrc-2019-000728supp003.pdf]

## Appendix 3 Characteristics of the 84 studies included in the network meta-analysis

| Study ID                                       | NCT number  | Incretin-based regimens | Control treatments | Size  | Background Medicine | Trial duration (w) | *Outcome | Baseline information |           |               |
|------------------------------------------------|-------------|-------------------------|--------------------|-------|---------------------|--------------------|----------|----------------------|-----------|---------------|
|                                                |             |                         |                    |       |                     |                    |          | Age (yrs)            | HbA1c (%) | Years of T2DM |
| Bajaj M 2014 <sup>[1]</sup>                    | NCT00996658 | DPP4                    | Placebo            | 272   | MET+PIG             | 24                 | C        | 53.8                 | 8.42      | NA            |
| Barnett AH 2012 <sup>[2]</sup>                 | NCT00740051 | DPP4                    | Placebo            | 227   | NO                  | 18                 | C        | 56.5                 | 8.09      | NA            |
| Barzilai N 2011 <sup>[3]</sup>                 | NCT00305604 | DPP4                    | Placebo            | 206   | OAD                 | 24                 | C        | 71.9                 | 7.8       | 7.1           |
| Bosi E 2011 <sup>[4]</sup>                     | NCT00432276 | DPP4                    | Placebo            | 803   | MET+PIG             | 52                 | CR       | 55.1                 | 8.2       | 7.16          |
| Chan JCN 2008 <sup>[5]</sup>                   | NCT00095056 | DPP4                    | SU                 | 91    | NO                  | 54                 | CP       | 67.9                 | 7.66      | 13.49         |
| ENDURE, NCT00856284, 2013 <sup>[6]</sup>       | NCT00856284 | DPP4                    | SU                 | 2620  | MET                 | 104                | CR       | 55.4                 | 7.6       | 5.5           |
| EXAMINE, White WB 2013 <sup>[7]</sup>          | NCT00968708 | DPP4                    | Placebo            | 5380  | OAD                 | 76                 | CGHR     | 61                   | 8         | 7.2           |
| GENERATION, Schernthaner G 2015 <sup>[8]</sup> | NCT01006603 | DPP4                    | SU                 | 718   | MET                 | 52                 | CHP      | 72.6                 | 7.6       | 7.6           |
| Gallwitz B 2012 <sup>[9]</sup>                 | NCT00622284 | DPP4                    | SU                 | 1551  | MET                 | 104                | CGPR     | 59.8                 | 7.7       | NA            |
| Göke B 2013 <sup>[10]</sup>                    | NCT00575588 | DPP4                    | SU                 | 858   | MET                 | 104                | C        | 57.6                 | 7.65      | 5.45          |
| Haak T 2013 <sup>[11]</sup>                    | NCT00915772 | DPP4                    | Placebo            | 566   | MET                 | 54                 | C        | 55.8                 | 7.5       | NA            |
| Hartley P 2015 <sup>[12]</sup>                 | NCT01189890 | DPP4                    | SU                 | 477   | NO                  | 30                 | C        | 70.7                 | 7.78      | 8.69          |
| Laakso M 2015 <sup>[13]</sup>                  | NCT01087502 | DPP4                    | SU                 | 235   | NO                  | 52                 | C        | 66.6                 | 8.05      | NA            |
| NCT00295633 2014                               | NCT00295633 | DPP4                    | Placebo            | 565   | TZD                 | 24                 | C        | 54                   | 8.3       | 5.2           |
| NCT00374907 2008                               | NCT00374907 | DPP4                    | Met                | 36    | MET                 | 116                | C        | 55.5                 | NA        | NA            |
| NCT00813995 2014                               | NCT00813995 | DPP4                    | Placebo            | 395   | MET                 | 24                 | C        | 54.6                 | 8.5       | 6.85          |
| NCT01183013 2014                               | NCT01183013 | DPP4                    | Placebo            | 801   | TZD                 | 54                 | CR       | 57.3                 | 8.12      | NA            |
| Nauck M 2007 <sup>[14]</sup>                   | NCT00094770 | DPP4                    | SU                 | 1172  | MET                 | 104                | CGHR     | 56.7                 | 7.7       | 6.35          |
| Olansky L 2011 <sup>[15]</sup>                 | NCT00482729 | DPP4                    | Placebo            | 1246  | MET                 | 44                 | C        | 49.7                 | 9.87      | 3.35          |
| Pratley RE 2009 <sup>[16]</sup>                | NCT00286494 | DPP4                    | Placebo            | 494   | MET+TZD/SU+TZD      | 26                 | C        | 55.4                 | 8         | 7.6           |
| Raz I 2008 <sup>[17]</sup>                     | NCT00337610 | DPP4                    | Placebo            | 190   | MET                 | 18                 | CP       | 54.8                 | 9.2       | 7.9           |
| Roden M 2013 <sup>[18]</sup>                   | NCT01177813 | DPP4                    | Placebo<br>SGLT2   | 899   | NO                  | 24                 | C        | 55                   | 7.88      | NA            |
| Rosenstock J 2009 <sup>[19]</sup>              | NCT00121641 | DPP4                    | Placebo            | 401   | MET                 | 24                 | C        | 53.5                 | 7.9       | 2.56          |
| Rosenstock J 2010 <sup>[20]</sup>              | NCT00395512 | DPP4                    | TZD                | 409   | MET                 | 26                 | C        | 52.8                 | 8.81      | 3.2           |
| SAVOR-TIMI 53 Raz I 2014 <sup>[21]</sup>       | NCT01107886 | DPP4                    | Placebo            | 16492 | Insulin/MET/SU      | 109                | CGHPR    | 65                   | 8         | 10.3          |
| Shankar RR 2017 <sup>[22]</sup>                | NCT01755156 | DPP4                    | SU                 | 402   | MET                 | 104                | CH       | 57.2                 | 8.05      | 7.8           |
| Sheu W 2015 <sup>[23]</sup>                    | NCT00954447 | DPP4                    | Placebo            | 1261  | Insulin             | 52                 | CGH      | 60                   | 8.3       | NA            |
| Wainstein J 2012 <sup>[24]</sup>               | NCT00532935 | DPP4                    | TZD                | 517   | MET/NO              | 32                 | C        | 52.3                 | 8.9       | 3.24          |
| Araki E, 2015 <sup>[25]</sup>                  | NCT01584232 | GLP1RA                  | Insulin            | 361   | OAD                 | 26                 | CH       | 56.8                 | 8         | 8.86          |
| Davies MJ, 2016 <sup>[26]</sup>                | NCT01620489 | GLP1RA                  | Placebo            | 277   | Met SU/TZD          | 26                 | C        | 67.2                 | 8.04      | 15.06         |
| EUREXA, Gallwitz, B, 2012 <sup>[27]</sup>      | NCT00359762 | GLP1RA                  | SU                 | 1019  | MET                 | 156                | CR       | 56.4                 | 7.4       | 5.65          |
| GetGoal-DUO-1, Riddle MC, 2013 <sup>[28]</sup> | NCT00975286 | GLP1RA                  | Placebo            | 446   | Insulin+MET         | 24                 | C        | 56.2                 | 7.58      | 9.17          |
| GetGoal-Mono, Fonseca VA, 2012 <sup>[29]</sup> | NCT00688701 | GLP1RA                  | Placebo            | 361   | NO                  | 12                 | C        | 53.7                 | 8.04      | 1.1           |
| HARMONY-2, Nauck, MA, 2016 <sup>[30]</sup>     | NCT00849017 | GLP1RA                  | Placebo            | 301   | NO                  | 156                | C        | 52.9                 | 8.07      | 3.97          |
| HARMONY-6, Rosenstock J, 2014 <sup>[31]</sup>  | NCT00976391 | GLP1RA                  | Insulin            | 566   | Insulin             | 60                 | C        | 55.6                 | 8.45      | 11            |
| LEAD-2, Nauck M, 2009 <sup>[32]</sup>          | NCT00318461 | GLP1RA                  | Placebo<br>SU      | 1087  | MET                 | 104                | CHR      | 56.7                 | 8.4       | 7.4           |
| LEAD-3, Garber A, 2011 <sup>[33]</sup>         | NCT00294723 | GLP1RA                  | SU                 | 745   | Met/SU /Met+TZD     | 104                | C        | 53                   | 8.3       | 5.4           |
| LEADER, Marre M, 2015 <sup>[34]</sup>          | NCT01179048 | GLP1RA                  | Placebo            | 9340  | Met/SU /Met+TZD     | 262                | CGHPR    | 64.3                 | 8.7       | 12.7          |

|                                                            |             |        |                   |       |                     |     |       |      |      |       |
|------------------------------------------------------------|-------------|--------|-------------------|-------|---------------------|-----|-------|------|------|-------|
| Miyagawa J, 2015 <sup>[35]</sup>                           | NCT01558271 | GLP1RA | Placebo           | 487   | NO                  | 26  | CP    | 57.5 | 8.14 | 6.59  |
| Pfeffer MA, 2015 <sup>[36]</sup>                           | NCT01147250 | GLP1RA | Placebo           | 6063  | NO                  | 108 | CGHPR | 60.3 | 7.68 | 9.29  |
| Umpierrez GE, 2011 <sup>[37]</sup>                         | NCT00630825 | GLP1RA | Placebo           | 262   | OAD                 | 16  | C     | 56.7 | 8.24 | 8.3   |
| CANTATA-D Trial, Lavalley-Gonzalez FJ 2013 <sup>[38]</sup> | NCT01106677 | DPP4   | Placebo<br>SGLT2  | 1284  | MET                 | 26  | G     | 55.4 | 7.9  | 6.9   |
| Kadowaki T, 2013 <sup>[39]</sup>                           | NCT01026194 | DPP4   | TZD               | 204   | TZD                 | 12  | G     | 58.2 | 7.8  | 6.2   |
| MARLINA-T2D study Groop P 2015 <sup>[40]</sup>             | NCT01792518 | DPP4   | Placebo           | 360   | NO                  | 24  | G     | 60.6 | 7.84 | NA    |
| NCT00121667 2014                                           | NCT00121667 | DPP4   | Placebo           | 743   | MET+PIG             | 206 | G     | 54.6 | 8.1  | 6.53  |
| NCT00998881 2014                                           | NCT00998881 | DPP4   | Placebo           | 203   | NO                  | 12  | G     | 58.9 | NA   | NA    |
| NCT01215097 2013                                           | NCT01215097 | DPP4   | Placebo           | 305   | MET                 | 24  | G     | 55.5 | 7.99 | NA    |
| DURATION-4, Russell-Jones D, 2012 <sup>[41]</sup>          | NCT00676338 | DPP4   | Met<br>GLP1RA     | 820   | NO                  | 26  | GH    | 53.7 | 8.5  | 2.67  |
| GetGoal-S, Rosenstock J, 2014 <sup>[42]</sup>              | NCT00713830 | GLP1RA | Placebo           | 859   | Met/SU              | 24  | GHR   | 57.2 | 8.25 | 9.33  |
| HARMONY-3, Ahren B, 2014 <sup>[43]</sup>                   | NCT00838903 | DPP4   | Placebo<br>GLP1RA | 1012  | MET                 | 156 | R     | 54.5 | 8.11 | 6.01  |
| Kadowaki T, 2011 <sup>[44]</sup>                           | NCT00577824 | GLP1RA | Placebo           | 179   | SU/TZD              | 24  | G     | 58.4 | 8.6  | 11.95 |
| Kaku K, 2016 <sup>[45]</sup>                               | NCT01512108 | GLP1RA | Placebo           | 360   | OAD                 | 52  | G     | 59.5 | 8.1  | 8.02  |
| Seino Y, 2010 <sup>[46]</sup>                              | NCT00393718 | GLP1RA | SU                | 400   | Diet+exercise       | 52  | GR    | 58.3 | 8.28 | 8.25  |
| Arechavaleta R 2009 <sup>[47]</sup>                        | NCT00701090 | DPP4   | SU                | 1034  | MET                 | 30  | P     | 56.3 | 7.5  | 6.75  |
| Arjona Ferreira JC 2013 <sup>[48]</sup>                    | NCT00509262 | DPP4   | SU                | 422   | NO                  | 54  | P     | 59.5 | 7.85 | 17.5  |
| Barnett AH, 2013 <sup>[49]</sup>                           | NCT00757588 | DPP4   | Placebo           | 455   | Insulin/Insulin+MET | 52  | P     | 57.2 | 8.67 | 11.93 |
| Charbonnel B 2006 <sup>[50]</sup>                          | NCT00086515 | DPP4   | SU                | 701   | MET+TZD             | 104 | HP    | 54.5 | 8    | 6.2   |
| Frederich R 2012 <sup>[51]</sup>                           | NCT00316082 | DPP4   | Placebo           | 365   | NO                  | 24  | P     | 55.2 | 7.93 | 1.65  |
| Goldstein BJ 2007-pc1 <sup>[52]</sup>                      | NCT00103857 | DPP4   | Met               | 355   | NO                  | 104 | P     | 53.5 | 8.8  | 4.5   |
| Goldstein BJ 2007-pc2 <sup>[52]</sup>                      | NCT00103857 | DPP4   | Placebo           | 372   | MET                 | 104 | P     | 53.5 | 8.8  | 4.5   |
| Goldstein BJ 2007-pc3 <sup>[52]</sup>                      | NCT00103857 | DPP4   | Placebo           | 364   | MET                 | 104 | P     | 53.5 | 8.8  | 4.5   |
| Jadzinsky M 2009 <sup>[53]</sup>                           | NCT00327015 | DPP4   | Met               | 499   | MET                 | 24  | P     | 52.0 | 9.5  | 1.7   |
| NCT01183013 2014                                           | NCT01183013 | DPP4   | Placebo           | 801   | TZD                 | 54  | C+P   | 57.3 | 8.12 | NA    |
| NCT01519674 2014                                           | NCT01519674 | DPP4   | Placebo           | 575   | Insulin+MET         | 24  | P     | 55.6 | 8.4  | NA    |
| TECOS Green JB 2015 <sup>[54]</sup>                        | NCT00790205 | DPP4   | Placebo           | 14540 | OAD                 | 156 | CGHPR | 65.5 | 7.2  | 11.6  |
| Violante R 2012 <sup>[55]</sup>                            | NCT00870194 | DPP4   | Placebo           | 255   | Exenatide, MET      | 20  | P     | 56   | 7.89 | 8     |
| AWARD-1, Wysham C, 2014 <sup>[56]</sup>                    | NCT01064687 | GLP1RA | Placebo           | 978   | Met+Pig             | 26  | P     | 55.7 | 8.07 | 8.76  |
| DUAL-I, Holst JJ, 2016 <sup>[57]</sup>                     | NCT01336023 | GLP1RA | Insulin           | 824   | Met+Pig             | 26  | P     | 55   | 8.3  | 7.1   |
| Diamant M, 2014, 30w <sup>[58]</sup>                       | NCT00960661 | GLP1RA | Insulin           | 627   | Insulin+MET         | 30  | PR    | 59.5 | 8.24 | 12    |
| EAGLE D'Alessio D, 2015 <sup>[59]</sup>                    | NCT01117350 | GLP1RA | Insulin           | 965   | Met/SU/Met+SU       | 24  | P     | 57.3 | 9.07 | 8.5   |
| GetGoal-FI, Bolli G, 2013 <sup>[60]</sup>                  | NCT00763451 | GLP1RA | Placebo           | 482   | MET                 | 24  | P     | 56.1 | 8.04 | 6     |
| GetGoal-L, Riddle MC, 2013 <sup>[61]</sup>                 | NCT00715624 | GLP1RA | Placebo           | 495   | Met/SU/TZD          | 24  | P     | 57.2 | 8.4  | 12.5  |
| GetGoal-M, Ahren B, 2013 <sup>[62]</sup>                   | NCT00712673 | GLP1RA | Placebo           | 680   | MET                 | 24  | PR    | 54.7 | 8.06 | 6.11  |
| HARMONY-5, Home PD, 2015 <sup>[63]</sup>                   | NCT00839527 | GLP1RA | Placebo<br>TZD    | 663   | Met+Glimepride      | 156 | PR    | 55.2 | 8.24 | 8.9   |
| LixiLan-O, Davies, MJ, 2017 <sup>[64]</sup>                | NCT02058147 | GLP1RA | Insulin           | 700   | MET                 | 30  | P     | 58.4 | 8.09 | 9.8   |
| SUSTAIN-6, Marso SP, 2016 <sup>[65]</sup>                  | NCT01720446 | GLP1RA | Placebo           | 3297  | NO                  | 104 | CGHPR | 64.6 | 8.7  | 13.9  |
| Terauchi Y, 2014 <sup>[66]</sup>                           | NCT01001104 | GLP1RA | Placebo           | 145   | MET                 | 12  | P     | 52.2 | 8    | 4.6   |
| Matthaei S 2016 <sup>[67]</sup>                            | NCT01619059 | DPP4   | Placebo           | 315   | dapagliflozin, MET  | 24  | H     | 54.6 | 7.91 | 7.7   |

|                                               |               |        |         |     |            |    |    |      |      |       |
|-----------------------------------------------|---------------|--------|---------|-----|------------|----|----|------|------|-------|
| AWARD-9, Pozzilli P, 2017 <sup>[68]</sup>     | NCT02152371   | GLP1RA | Placebo | 300 | Insulin    | 28 | H  | 60.4 | 8.35 | 13.15 |
| SCALE, Davies MJ, 2015 <sup>[69]</sup>        | NCT01272232   | GLP1RA | Placebo | 844 | NO         | 68 | HR | 54.9 | 7.9  | 7.3   |
| L-STEP study Fujitani Y 2016 <sup>[70]</sup>  | UMIN000008591 | DPP4   | AGIs    | 378 | NO         | 12 | R  | 61.0 | 6.95 | NA    |
| Vilsboll T 2010 <sup>[71]</sup>               | NCT00395343   | DPP4   | Placebo | 641 | Insulin    | 24 | R  | 57.8 | 8.7  | 12.5  |
| AWARD-4, Blonde L, 2015 <sup>[72]</sup>       | NCT01191268   | GLP1RA | Insulin | 884 | Insulin    | 52 | R  | 59.4 | 8.46 | 12.73 |
| GetGoal-L-Asia, Seino Y, 2012 <sup>[73]</sup> | NCT00866658   | GLP1RA | Placebo | 311 | Insulin/SU | 24 | R  | 58.4 | 8.53 | 13.92 |

\*Abbreviation: C:colon; G: gastric; H:hepatic; P:pancreatic; R:rectal

1. Bajaj, M., et al., *Linagliptin improved glycaemic control without weight gain or hypoglycaemia in patients with Type 2 diabetes inadequately controlled by a combination of metformin and pioglitazone: a 24-week randomized, double-blind study*. Diabet Med, 2014.
2. Barnett, A.H., et al., *Linagliptin monotherapy in type 2 diabetes patients for whom metformin is inappropriate: an 18-week randomized, double-blind, placebo-controlled phase III trial with a 34-week active-controlled extension*. Diabetes Obes Metab, 2012.
3. Barzilai, N., et al., *Efficacy and tolerability of sitagliptin monotherapy in elderly patients with type 2 diabetes: A randomized, double-blind, placebo-controlled trial*. Current Medical Research and Opinion, 2011. **27**(5): p. 1049-1058.
4. Bosi, E., et al., *Alogliptin as a third oral antidiabetic drug in patients with type 2 diabetes and inadequate glycaemic control on metformin and pioglitazone: A 52-week, randomized, double-blind, active-controlled, parallel-group study*. Diabetes, Obesity and Metabolism, 2011. **13**(12): p. 1088-1096.
5. Chan, J.C.N., et al., *Safety and efficacy of sitagliptin in patients with type 2 diabetes and chronic renal insufficiency*. Diabetes, Obesity and Metabolism, 2008. **10**(7): p. 545-555.
6. Gordon, J., et al., *The Cost-Effectiveness of Alogliptin Versus Sulfonylurea as Add-on Therapy to Metformin in Patients with Uncontrolled Type 2 Diabetes Mellitus*. Diabetes Ther, 2016. **7**(4): p. 825-845.
7. White, W.B., et al., *Alogliptin after acute coronary syndrome in patients with type 2 diabetes*. N Engl J Med, 2013. **369**(14): p. 1327-35.
8. Scherthaner, G., et al., *Efficacy and tolerability of saxagliptin compared with glimepiride in elderly patients with type 2 diabetes: A randomized, controlled study (GENERATION)*. Diabetes, Obesity and Metabolism, 2015. **17** (7): p. 630-638.
9. Gallwitz, B., et al., *2-year efficacy and safety of linagliptin compared with glimepiride in patients with type 2 diabetes inadequately controlled on metformin: a randomised, double-blind, non-inferiority trial*. Lancet, 2012. **380**(9840): p. 475-83.
10. Göke, B., et al. *Saxagliptin vs. glipizide as add-on therapy in patients with type 2 diabetes mellitus inadequately controlled on metformin alone: long-term (52-week) extension of a 52-week randomised controlled trial*. International journal of clinical practice, 2013. **67**, 307-16.
11. Haak, T., et al., *Initial combination of linagliptin and metformin in patients with type 2 diabetes: efficacy and safety in a randomised, double-blind 1-year extension study*. Int J Clin Pract, 2013. **67**(12): p. 1283-93.
12. Hartley, P., et al., *Efficacy and Tolerability of Sitagliptin Compared with Glimepiride in Elderly Patients with Type 2 Diabetes Mellitus and Inadequate Glycemic Control: A Randomized, Double-Blind, Non-Inferiority Trial*. Drugs and Aging, 2015. **32** (6): p. 469-476.
13. Laakso, M., et al., *Treatment with the dipeptidyl peptidase-4 inhibitor linagliptin or placebo followed by glimepiride in patients with type 2 diabetes with moderate to severe renal impairment: A 52-week, randomized, double-blind clinical trial*. Diabetes Care, 2015. **38** (2): p. e15-e17.
14. Nauck, M.A., et al., *Efficacy and safety of the dipeptidyl peptidase-4 inhibitor, sitagliptin, compared with the sulfonylurea, glipizide, in patients with type 2 diabetes inadequately controlled on metformin alone: A randomized, double-blind, non-inferiority trial*. Diabetes, Obesity and Metabolism, 2007. **9**(2): p. 194-205.
15. Olansky, L., et al., *A treatment strategy implementing combination therapy with sitagliptin and metformin results in superior glycaemic control versus metformin monotherapy due to a low rate of addition of antihyperglycaemic agents*. Diabetes, Obesity and Metabolism, 2011. **13**(9): p. 841-849.

16. Pratley, R.E., et al., *Efficacy and safety of the dipeptidyl peptidase-4 inhibitor alogliptin added to pioglitazone in patients with type 2 diabetes: A randomized, double-blind, placebo-controlled study*. Current Medical Research and Opinion, 2009. **25**(10): p. 2361-2371.
17. Raz, I., et al., *Efficacy and safety of sitagliptin added to ongoing metformin therapy in patients with type 2 diabetes*. Current Medical Research and Opinion, 2008. **24**(2): p. 537-550.
18. Roden, M., et al., *Empagliflozin monotherapy with sitagliptin as an active comparator in patients with type 2 diabetes: A randomised, double-blind, placebo-controlled, phase 3 trial*. The Lancet Diabetes and Endocrinology, 2013. **1**(3): p. 208-219.
19. Rosenstock, J., et al., *Effect of saxagliptin monotherapy in treatment-naive patients with type 2 diabetes*. Current Medical Research & Opinion, 2009. **25**, 2401-2411.
20. Rosenstock, J., et al., *Initial combination therapy with alogliptin and pioglitazone in drug-naïve patients with type 2 diabetes*. Diabetes Care, 2010. **33**(11): p. 2406-2408.
21. Raz, I., et al., *Incidence of pancreatitis and pancreatic cancer in a randomized controlled multicenter trial (SAVOR-TIMI 53) of the dipeptidyl peptidase-4 inhibitor saxagliptin*. Diabetes care, 2014. **37**: p. 2435-41.
22. Shankar, R.R., et al., *A randomized clinical trial evaluating the efficacy and safety of the once-weekly dipeptidyl peptidase-4 inhibitor omarigliptin in patients with type 2 diabetes inadequately controlled on metformin monotherapy*. Current medical research and opinion, 2017: p. 1-20.
23. Sheu, W.H.H., et al., *Linagliptin improves glycemic control after 1 year as add-on therapy to basal insulin in Asian patients with type 2 diabetes mellitus*. Current medical research and opinion, 2015. **31** (3): p. 503-512.
24. *Monotherapy Study of MP-513 in Patients With Type 2 Diabetes*. Has Results.
25. Araki, E., et al., *Efficacy and safety of once-weekly dulaglutide in combination with sulphonylurea and/or biguanide compared with once-daily insulin glargine in Japanese patients with type 2 diabetes: A randomized, open-label, phase III, non-inferiority study*. Diabetes, Obesity and Metabolism, 2015. **17**(10): p. 994-1002.
26. Davies, M.J., et al., *Efficacy and Safety of Liraglutide Versus Placebo as Add-on to Glucose-Lowering Therapy in Patients With Type 2 Diabetes and Moderate Renal Impairment (LIRA-RENAL): A Randomized Clinical Trial*. Diabetes Care, 2016. **39**(2): p. 222-30.
27. Gallwitz, B., et al., *Exenatide twice daily versus glimepiride for prevention of glycaemic deterioration in patients with type 2 diabetes with metformin failure (EUREXA): an open-label, randomised controlled trial*. The Lancet, 2012. **6736**(12): p. 1-9.
28. Riddle, M.C., et al., *Adding Once-Daily Lixisenatide for Type 2 Diabetes Inadequately Controlled With Newly Initiated and Continuously Titrated Basal Insulin Glargine: A 24-Week, Randomized, Placebo-Controlled Study (GetGoal-Duo 1)*. Diabetes Care, 2013. **36**(9): p. 2497-503.
29. Fonseca, V.A., et al., *Efficacy and Safety of the Once-Daily GLP-1 Receptor Agonist Lixisenatide in Monotherapy: A randomized, double-blind, placebo-controlled trial in patients with type 2 diabetes (GetGoal-Mono)*. Diabetes Care, 2012. **35**(6): p. 1225-31.
30. Nauck, M.A., et al., *Efficacy and safety of once-weekly GLP-1 receptor agonist albiglutide (HARMONY 2): 52 week primary endpoint results from a randomised, placebo-controlled trial in patients with type 2 diabetes mellitus inadequately controlled with diet and exercise*. Diabetologia, 2016. **59**(2): p. 266-74.
31. Rosenstock, J., et al., *Advancing basal insulin replacement in type 2 diabetes inadequately controlled with insulin glargine plus oral agents: a comparison of adding albiglutide, a weekly GLP-1 receptor agonist, versus thrice-daily prandial insulin lispro*. Diabetes Care, 2014. **37**(8): p. 2317-25.
32. Nauck, M., et al., *Efficacy and safety comparison of liraglutide, glimepiride, and placebo, all in combination with metformin, in type 2 diabetes*. Diabetes care, 2009. **32**(1): p. 84-90.
33. Garber, A., et al., *Liraglutide, a once-daily human glucagon-like peptide 1 analogue, provides sustained improvements in glycaemic control and weight for 2 years as monotherapy compared with glimepiride in patients with type 2 diabetes*. Diabetes, Obesity & Metabolism, 2011. **13**(4): p. 348-56.
34. Marre, M., et al., *Design of the Liraglutide effect and action in diabetes: Evaluation of cardiovascular outcome results (LEADER® trial)*. Medecine des Maladies Metaboliques, 2015. **9**(3): p. 316-328.
35. Miyagawa, J., et al., *Once-weekly glucagon-like peptide-1 receptor agonist dulaglutide is non-inferior to once-daily liraglutide and*

- superior to placebo in Japanese patients with type 2 diabetes: A 26-week randomized phase III study. *Diabetes, Obesity and Metabolism*, 2015. **17**(10): p. 974-983.
36. Pfeffer, M.A., et al., *Lixisenatide in patients with type 2 diabetes and acute coronary syndrome*. *New England Journal of Medicine*, 2015. **373**(23): p. 2247-2257.
37. Umpierrez, G.E., et al., *The effects of LY2189265, a long-acting glucagon-like peptide-1 analogue, in a randomized, placebo-controlled, double-blind study of overweight/obese patients with type 2 diabetes: the EGO study*. *Diabetes, Obesity & Metabolism*, 2011. **13**(5): p. 418-425.
38. Lavallo-Gonzalez, F.J., et al., *Efficacy and safety of canagliflozin compared with placebo and sitagliptin in patients with type 2 diabetes on background metformin monotherapy: A randomised trial*. *Diabetologia*, 2013. **56**(12): p. 2582-2592.
39. Kadowaki, T. and K. Kondo, *Efficacy and safety of teneligliptin in combination with pioglitazone in Japanese patients with type 2 diabetes mellitus*. *J Diabetes Investig*, 2013. **4**(6): p. 576-84.
40. Groop, P.H., et al., *Dipeptidyl peptidase-4 inhibition with linagliptin and effects on hyperglycaemia and albuminuria in patients with type 2 diabetes and renal dysfunction: Rationale and design of the MARLINA-T2D™ trial*. *Diabetes and Vascular Disease Research*, 2015. **12**(6): p. 455-462.
41. Russell-Jones, D., et al., *Efficacy and safety of exenatide once weekly versus metformin, pioglitazone, and sitagliptin used as monotherapy in drug-naïve patients with type 2 diabetes (DURATION-4): A 26-week double-blind study*. *Diabetes Care*, 2012. **35**(2): p. 252-258.
42. Rosenstock, J., et al., *Beneficial effects of once-daily lixisenatide on overall and postprandial glycemic levels without significant excess of hypoglycemia in type 2 diabetes inadequately controlled on a sulfonylurea with or without metformin (GetGoal-5)*. *J Diabetes Complications*, 2014. **28**(3): p. 386-92.
43. Ahren, B., et al., *HARMONY 3: 104-Week Randomized, Double-Blind, Placebo- and Active-Controlled Trial Assessing the Efficacy and Safety of Albiglutide Compared With Placebo, Sitagliptin, and Glimepiride in Patients With Type 2 Diabetes Taking Metformin*. *Diabetes Care*, 2014.
44. Kadowaki, T., et al., *Improved glycemic control and reduced bodyweight with exenatide: A double-blind, randomized, phase 3 study in Japanese patients with suboptimally controlled type 2 diabetes over 24 weeks*. *Journal of Diabetes Investigation*, 2011. **2**(3): p. 210-217.
45. Kaku, K., et al., *Liraglutide is effective and well tolerated in combination with an oral antidiabetic drug in Japanese patients with type 2 diabetes: A randomized, 52-week, open-label, parallel-group trial*. *J Diabetes Investig*, 2016. **7**(1): p. 76-84.
46. Seino, Y., et al., *Efficacy and safety of the once-daily human GLP-1 analogue, liraglutide, vs glibenclamide monotherapy in Japanese patients with type 2 diabetes*. *Current Medical Research and Opinion*, 2010. **26**(5): p. 1013-1022.
47. Arechavaleta, R., et al., *Efficacy and safety of treatment with sitagliptin or glimepiride in patients with type 2 diabetes inadequately controlled on metformin monotherapy: a randomized, double-blind, non-inferiority trial*. *Diabetes Obes Metab*, 2011. **13**(2): p. 160-8.
48. Arjona Ferreira, J.C., et al., *Efficacy and safety of sitagliptin versus glipizide in patients with type 2 diabetes and moderate-to-severe chronic renal insufficiency*. *Diabetes Care*, 2013. **36**(5): p. 1067-1073.
49. Barnett, A.H., et al., *Saxagliptin add-on therapy to insulin with or without metformin for type 2 diabetes mellitus: 52-week safety and efficacy*. *Clin Drug Investig*, 2013. **33**(10): p. 707-17.
50. Charbonnel, B., et al., *Efficacy and safety of the dipeptidyl peptidase-4 inhibitor sitagliptin added to ongoing metformin therapy in patients with type 2 diabetes inadequately controlled with metformin alone*. *Diabetes Care*, 2006. **29**(12): p. 2638-2643.
51. Frederich, R., et al., *The efficacy and safety of the dipeptidyl peptidase-4 inhibitor saxagliptin in treatment-naïve patients with type 2 diabetes mellitus: a randomized controlled trial*. *Diabetol Metab Syndr*, 2012. **4**(1): p. 36.
52. Goldstein, B.J., et al., *Effect of initial combination therapy with sitagliptin, a dipeptidyl peptidase-4 inhibitor, and metformin on glycemic control in patients with type 2 diabetes*. *Diabetes Care*, 2007. **30**(8): p. 1979-87.
53. Jadzinsky, M., et al., *Saxagliptin given in combination with metformin as initial therapy improves glycaemic control in patients with*

- type 2 diabetes compared with either monotherapy: a randomized controlled trial.* Diabetes Obes Metab, 2009. **11**(6): p. 611-22.
54. Green, J.B., et al., *Effect of sitagliptin on cardiovascular outcomes in type 2 diabetes.* New England Journal of Medicine, 2015. **373**(3): p. 232-242.
55. Violante, R., et al., *A randomized non-inferiority study comparing the addition of exenatide twice daily to sitagliptin or switching from sitagliptin to exenatide twice daily in patients with Type2 diabetes experiencing inadequate glycaemic control on metformin and sitagliptin.* Diabetic Medicine, 2012. **29**(11): p. e417-e424.
56. Wysham, C., et al., *Efficacy and Safety of Dulaglutide Added on to Pioglitazone and Metformin Versus Exenatide in Type 2 Diabetes in a Randomized Controlled Trial (AWARD-1).* Diabetes Care, 2014.
57. Holst, J.J., et al., *IDegLira Improves Both Fasting and Postprandial Glucose Control as Demonstrated Using Continuous Glucose Monitoring and a Standardized Meal Test.* Journal of Diabetes Science and Technology, 2016. **10**(2): p. 389-397.
58. Diamant, M., et al., *Glucagon-like peptide 1 receptor agonist or bolus insulin with optimized basal insulin in type 2 diabetes.* Diabetes Care, 2014. **37**(10): p. 2763-2773.
59. D'Alessio, D., et al., *Comparison of insulin glargine and liraglutide added to oral agents in patients with poorly controlled type 2 diabetes.* Diabetes, Obesity and Metabolism, 2015. **17**(2): p. 170-178.
60. Bolli, G.B., et al., *Efficacy and safety of lixisenatide once daily vs. placebo in people with Type 2 diabetes insufficiently controlled on metformin (GetGoal-F1).* Diabet Med, 2014. **31**(2): p. 176-84.
61. Riddle, M.C., et al., *Adding Once-Daily Lixisenatide for Type 2 Diabetes Inadequately Controlled by Established Basal Insulin: A 24-week, randomized, placebo-controlled comparison (GetGoal-L).* Diabetes Care, 2013. **36**(9): p. 2489-96.
62. Ahren, B., et al., *Efficacy and Safety of Lixisenatide Once-Daily Morning or Evening Injections in Type 2 Diabetes Inadequately Controlled on Metformin (GetGoal-M).* Diabetes Care, 2013. **36**(9): p. 2543-50.
63. Home, P., et al., *Efficacy and tolerability of albiglutide versus placebo and versus pioglitazone over 1 year in people with type 2 diabetes currently taking metformin and glimepiride: HARMONY 5.* Diabetes Obes Metab, 2014.
64. Rosenstock, J., et al., *Benefits of LixiLan, a Titratable Fixed-Ratio Combination of Insulin Glargine Plus Lixisenatide, Versus Insulin Glargine and Lixisenatide Monocomponents in Type 2 Diabetes Inadequately Controlled on Oral Agents: The LixiLan-O Randomized Trial.* Diabetes Care, 2016. **39**(11): p. 2026-2035.
65. Marso, S.P., et al., *Semaglutide and cardiovascular outcomes in patients with type 2 diabetes.* New England Journal of Medicine, 2016. **375**(19): p. 1834-1844.
66. Terauchi, Y., et al., *Monotherapy with the once weekly GLP-1 receptor agonist dulaglutide for 12 weeks in Japanese patients with type 2 diabetes: Dose-dependent effects on glycaemic control in a randomised, Double-blind, Placebo-controlled study.* Endocrine Journal, 2014. **61**(10): p. 949-959.
67. Matthaei, S., et al., *One-year efficacy and safety of saxagliptin add-on in patients receiving dapagliflozin and metformin.* Diabetes, Obesity and Metabolism, 2016. **18**(11): p. 1128-1133.
68. Pozzilli, P., et al., *Placebo-controlled, randomized trial of the addition of once-weekly glucagon-like peptide-1 receptor agonist dulaglutide to titrated daily insulin glargine in patients with type 2 diabetes (AWARD-9).* Diabetes Obes Metab, 2017.
69. Davies, M.J., et al., *Efficacy of Liraglutide for Weight Loss Among Patients With Type 2 Diabetes: The SCALE Diabetes Randomized Clinical Trial.* JAMA, 2015. **314**(7): p. 687-99.
70. Fujitani, Y., et al., *Effects of linagliptin monotherapy compared with voglibose on postprandial blood glucose responses in Japanese patients with type 2 diabetes: Linagliptin Study of Effects on Postprandial blood glucose (L-STEP).* Diabetes Research and Clinical Practice, 2016. **121**: p. 146-156.
71. Vilsboll, T., et al., *Efficacy and safety of sitagliptin when added to insulin therapy in patients with type 2 diabetes.* Diabetes, Obesity and Metabolism, 2010. **12**(2): p. 167-177.
72. Blonde, L., et al., *Once-weekly dulaglutide versus bedtime insulin glargine, both in combination with prandial insulin lispro, in patients with type 2 diabetes: A randomised, open-label, phase 3, non-inferiority study.* The Lancet, 2015. **385**(9982): p. 2057-2066.
73. Seino, Y., et al., *Randomized, double-blind, placebo-controlled trial of the once-daily GLP-1 receptor agonist lixisenatide in Asian*

*patients with type 2 diabetes insufficiently controlled on basal insulin with or without a sulfonylurea (GetGoal-L-Asia). Diabetes Obes Metab, 2012. 14(10): p. 910-7.*
