# Supplementary material for: Effect of incretin-based therapies on cancers of digestive system among 101 595 patients with type 2 diabetes mellitus: a systematic review and network meta-analysis combining 84 trials with a median duration of 30 weeks
Source: PubMed Central journal article supplement — BMJ Open Diabetes Res Care. 2019 Sep 20;7(1):e000728. doi: 10.1136/bmjdrc-2019-000728 (PMC6777405; doi:10.1136/bmjdrc-2019-000728), 2019-09-20
Supplement: bmjdrc-2019-000728supp005.pdf [file bmjdrc-2019-000728supp005.pdf]

## Appendix 5 Subgroup analysis based on the type of digestive system cancers

| Incretin           | 0.20 (0.01,4.93)     | 1.14 (0.18,7.23)   | 2.01(0.04,101.27) | 0.35 (0.03,4.25)  | 1.00 (0.61,1.64) |
|--------------------|----------------------|--------------------|-------------------|-------------------|------------------|
| 0.19 (0.01,3.15)   | Met                  | NA                 | NA                | 2.00 (0.08,49.20) | NA               |
| 1.14(0.18,7.24)    | 6.08 (0.21,177.76)   | SU                 | NA                | NA                | NA               |
| 7.66 (0.34,174.28) | 40.97 (0.61,2761.38) | 6.74 (0.18,254.22) | SGLT2             | NA                | 0.08 (0.00,2.05) |
| 0.35 (0.03,4.22)   | 1.88(0.11,31.64)     | 0.31 (0.01,6.85)   | 0.05 (0.00,2.48)  | TZD               | NA               |
| 0.99 (0.60,1.64)   | 5.31 (0.30,93.38)    | 0.87 (0.13,5.93)   | 0.13 (0.01,2.89)  | 2.83 (0.22,35.68) | Placebo          |

Appendix 5-Figure 1 Odds ratio with 95%CI of subgroup analysis for gastric cancer

| Incretin          | 0.99 (0.10,9.55)   | 0.92 (0.09,9.66)  | 2.00(0.04,101.13) | 1.05 (0.46,2.38) | 0.50 (0.02,16.21) | 0.79 (0.59,1.05)  |
|-------------------|--------------------|-------------------|-------------------|------------------|-------------------|-------------------|
| 0.99 (0.10,9.56)  | Insulin            | NA                | NA                | NA               | NA                | NA                |
| 0.89 (0.09,8.76)  | 0.90 (0.04,22.48)  | Met               | NA                | NA               | NA                | NA                |
| 3.76 (0.17,84.23) | 3.79 (0.08,178.01) | 4.23(0.09,200.61) | SGLT2             | NA               | NA                | 0.17(0.01,4.13)   |
| 1.05 (0.47,2.38)  | 1.06 (0.10,11.84)  | 1.19 (0.10,13.44) | 0.28 (0.01,6.98)  | SU               | NA                | 0.50 (0.01,23.46) |
| 0.50 (0.05,4.79)  | 0.50 (0.02,12.38)  | 0.56 (0.02,13.98) | 0.13 (0.00,6.20)  | 0.47 (0.04,5.24) | TZD               | NA                |
| 0.79 (0.59,1.05)  | 0.80 (0.08,7.84)   | 0.89 (0.09,8.90)  | 0.21 (0.01,4.68)  | 0.75 (0.32,1.77) | 1.59 (0.16,15.66) | Placebo           |

Appendix 5-Figure 2 Odds ratio with 95%CI of subgroup analysis for colon cancer

| Incretin          | 0.18 (0.02,1.61)    | 1.12 (0.34,3.72)  | 3.07 (0.12,75.60) | 2.97 (0.12,73.34) | 0.75 (0.45,1.26)  |
|-------------------|---------------------|-------------------|-------------------|-------------------|-------------------|
| 0.18 (0.02,1.60)  | Insulin             | NA                | NA                | NA                | NA                |
| 1.15 (0.14,3.80)  | 6.56 (0.54,80.48)   | SU                | NA                | NA                | 0.41 (0.03,6.55)  |
| 2.69 (0.12,60.10) | 15.31 (0.34,690.44) | 2.33 (0.08,64.80) | TZD               | NA                | 0.42 (0.01,21.16) |
| 2.98(0.12,73.72)  | 16.97 (0.35,831.56) | 2.58 (0.08,79.08) | 1.11 (0.01,96.25) | AGIs              | NA                |
| 0.75 (0.45,1.25)  | 4.27 (0.44,41.07)   | 0.65 (0.18,2.34)  | 0.28 (0.01,6.36)  | 0.25 (0.01,6.47)  | Placebo           |

Appendix 5-Figure 3 Odds ratio with 95%CI of subgroup analysis for rectal cancer

|                          |                          |                          |                         |                         |                         |
|--------------------------|--------------------------|--------------------------|-------------------------|-------------------------|-------------------------|
| <b>Incretin</b>          | <b>2.98 (0.12,73.73)</b> | <b>0.60 (0.01,30.31)</b> | <b>0.88 (0.21,3.67)</b> | <b>0.13 (0.01,3.27)</b> | <b>1.05 (0.58,1.92)</b> |
| <b>3.00 (0.12,74.13)</b> | Insulin                  | NA                       | NA                      | NA                      | NA                      |
| <b>0.60 (0.01,30.29)</b> | 0.20 (0.00,31.70)        | Met                      | NA                      | NA                      | 0.22 (0.01,3.27)        |
| <b>0.91 (0.22,3.78)</b>  | 0.30 (0.01,10.14)        | 1.52 (0.02,98.66)        | SU                      | NA                      | 0.50 (0.01,25.46)       |
| <b>0.13 (0.01,3.25)</b>  | 0.04 (0.00,4.09)         | 0.22 (0.01,5.43)         | 0.14 (0.00,4.83)        | TZD                     | NA                      |
| <b>1.05 (0.58,1.91)</b>  | 0.35 (0.01,9.13)         | 1.75 (0.03,92.62)        | 1.15 (0.25,5.33)        | 7.97 (0.31,207.78)      | Placebo                 |

Appendix 5-Figure 4 Odds ratio with 95%CI of subgroup analysis for hepatic cancer

|                         |                         |                         |                         |                         |                         |
|-------------------------|-------------------------|-------------------------|-------------------------|-------------------------|-------------------------|
| <b>Incretin</b>         | <b>1.51 (0.32,7.05)</b> | <b>0.23 (0.02,2.24)</b> | <b>1.87 (0.52,6.67)</b> | <b>0.34 (0.01,8.40)</b> | <b>0.85 (0.53,1.36)</b> |
| <b>1.51 (0.32,7.05)</b> | Insulin                 | NA                      | NA                      | NA                      | NA                      |
| <b>0.23 (0.02,2.22)</b> | 0.15 (0.01,2.36)        | Met                     | NA                      | NA                      | NA                      |
| <b>1.87 (0.52,6.69)</b> | 1.24 (0.17,9.12)        | 8.13(0.60,109.55)       | SU                      | NA                      | NA                      |
| <b>0.48 (0.04,6.10)</b> | 0.32 (0.02,6.19)        | 2.08 (0.07,62.89)       | 0.26 (0.01,4.41)        | TZD                     | 1.25 (0.05,30.96)       |
| <b>0.84 (0.53,1.36)</b> | 0.56 (0.11,2.80)        | 3.67 (0.36,37.25)       | 0.45 (0.12,1.76)        | 1.77 (0.14,22.55)       | Placebo                 |

Appendix 5-Figure 5 Odds ratio with 95%CI of subgroup analysis for pancreatic cancer
