# Supplementary material for: Effect of incretin-based therapies on cancers of digestive system among 101 595 patients with type 2 diabetes mellitus: a systematic review and network meta-analysis combining 84 trials with a median duration of 30 weeks
Source: PubMed Central journal article supplement — BMJ Open Diabetes Res Care. 2019 Sep 20;7(1):e000728. doi: 10.1136/bmjdrc-2019-000728 (PMC6777405; doi:10.1136/bmjdrc-2019-000728), 2019-09-20
Supplement: bmjdrc-2019-000728supp006.pdf [file bmjdrc-2019-000728supp006.pdf]

## Appendix 6 Risk of incretin-based therapies on digestive system cancers in the subgroup analysis

| Characteristics<br>(No.of studies) | Insulin              | Met                  | SGLT-2              | SU                   | TZD                  | AGIs                |
|------------------------------------|----------------------|----------------------|---------------------|----------------------|----------------------|---------------------|
| All trials (84)                    | 1.00<br>(0.31,3.20)  | 2.69<br>(0.62,11.66) | 0.16<br>(0.02,1.47) | 0.68<br>(0.35,1.32)  | 2.04<br>(0.60,6.95)  | 0.29<br>(0.01,7.19) |
| Mean age                           |                      |                      |                     |                      |                      |                     |
| ≤60 years(69)                      | 0.81<br>(0.24,2.79)  | 2.19<br>(0.48,10.04) | 0.16<br>(0.02,1.40) | 0.55<br>(0.24,1.27)  | 1.68<br>(0.47,6.07)  | NA                  |
| >60 years (15)                     | NA                   | NA                   | NA                  | 0.70<br>(0.15,3.29)  | NA                   | 0.30(0.01,7.61)     |
| duration                           |                      |                      |                     |                      |                      |                     |
| ≤5 years (31)                      | NA                   | 2.25<br>(0.29,17.39) | NA                  | NA                   | 2.29<br>(0.30,17.71) | NA                  |
| 5-10 years (69)                    | 0.53<br>(0.11,2.55)  | NA                   | 0.13<br>(0.01,2.84) | 0.52<br>(0.22,1.20)  | 1.36<br>(0.22,8.24)  | NA                  |
| >10 years (19)                     | 2.47<br>(0.42,14.38) | NA                   | NA                  | 0.89<br>(0.10,7.58)  | NA                   | NA                  |
| Unclear (22)                       | NA                   | 3.28<br>(0.11,97.43) | 0.21<br>(0.01,4.77) | 2.13<br>(0.38,11.87) | NA                   | 0.28<br>(0.01,7.76) |
| Mean HbA1c%                        |                      |                      |                     |                      |                      |                     |
| ≤7.5% (10)                         | NA                   | NA                   | NA                  | 0.51<br>(0.10,2.54)  | NA                   | 0.30<br>(0.01,7.58) |
| 7.5%-8.0% (37)                     | 0.17<br>(0.01,3.65)  | NA                   | 0.16<br>(0.02,1.48) | 0.62<br>(0.24,1.60)  | 2.58<br>(0.10,66.93) | NA                  |
| 8.0%-8.5% (56)                     | 1.11<br>(0.25,4.98)  | 1.22<br>(0.09,15.69) | NA                  | 0.68<br>(0.18,2.53)  | 1.32<br>(0.21,8.32)  | NA                  |
| >8.5% (30)                         | 1.03<br>(0.06,16.88) | 4.50<br>(0.45,44.69) | NA                  | NA                   | 2.09<br>(0.21,20.73) | NA                  |

|                       |                      |                       |                     |                     |                      |                     |
|-----------------------|----------------------|-----------------------|---------------------|---------------------|----------------------|---------------------|
| Unclear (8)           | NA                   | NA                    | NA                  | NA                  | NA                   | NA                  |
| <b>Trial duration</b> |                      |                       |                     |                     |                      |                     |
| ≤24 weeks (73)        | 0.87<br>(0.05,14.98) | 5.42<br>(0.21,141.60) | 0.22<br>(0.01,4.82) | NA                  | 2.72<br>(0.10,71.51) | 0.29<br>(0.01,7.71) |
| 24-48 weeks (22)      | 0.24<br>(0.03,1.64)  | 1.07<br>(0.06,17.70)  | 0.10<br>(0.00,2.35) | 0.14<br>(0.01,1.80) | 1.29<br>(0.14,11.76) | NA                  |
| >48 weeks (46)        | 5.01<br>(0.54,46.14) | 3.06<br>(0.31,30.62)  | NA                  | 0.74<br>(0.37,1.49) | 0.95<br>(0.11,7.99)  | NA                  |
| <b>Sample size</b>    |                      |                       |                     |                     |                      |                     |
| ≤500 (127)            | 0.12<br>(0.01,2.71)  | 2.15<br>(0.45,10.29)  | 0.20<br>(0.01,4.40) | 0.70<br>(0.18,2.78) | 2.08<br>(0.51,8.49)  | 0.21<br>(0.01,5.35) |
| >500 (14)             | 1.40<br>(0.40,4.89)  | NA                    | 0.13<br>(0.01,2.83) | 0.62<br>(0.29,1.34) | 0.30<br>(0.01,7.60)  | NA                  |
