# Supplementary material for: Effect of incretin-based therapies on cancers of digestive system among 101 595 patients with type 2 diabetes mellitus: a systematic review and network meta-analysis combining 84 trials with a median duration of 30 weeks
Source: PubMed Central journal article supplement — BMJ Open Diabetes Res Care. 2019 Sep 20;7(1):e000728. doi: 10.1136/bmjdrc-2019-000728 (PMC6777405; doi:10.1136/bmjdrc-2019-000728), 2019-09-20
Supplement: bmjdrc-2019-000728supp007.pdf [file bmjdrc-2019-000728supp007.pdf]

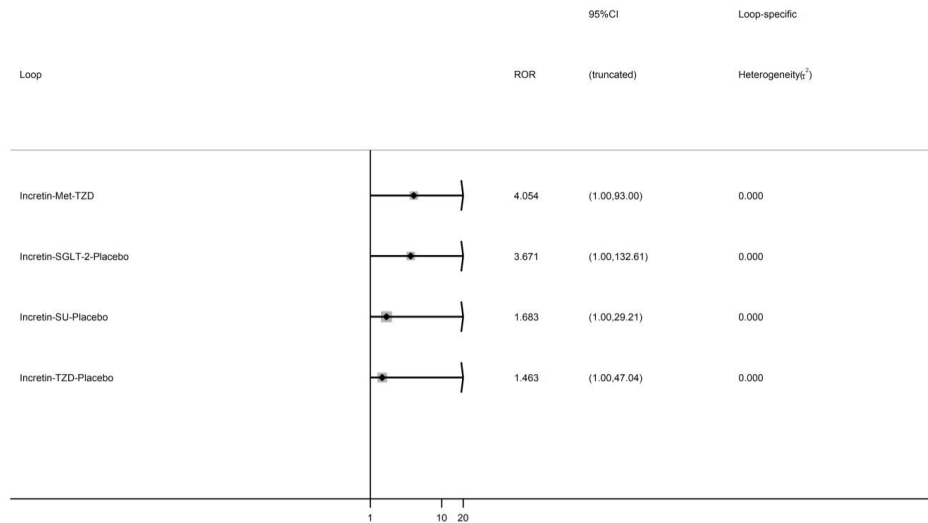

Appendix 7a Evaluation of the local inconsistency: forest plots of inconsistency check for all closed loops in the network

| comparison       | Direct     |           | Indirect   |          | Difference |          | p-value |
|------------------|------------|-----------|------------|----------|------------|----------|---------|
|                  | LogOR      | SE        | LogOR      | SE       | LogOR      | SE       |         |
| Incretin-Placebo | 0.1458498  | 0.1007699 | 1.710294   | 1.726609 | -1.564444  | 1.726267 | 0.365   |
| Incretin-Insulin | 0.1512883  | 0.582402  | -0.340743  | 329.7909 | 0.492031   | 329.7915 | 0.999   |
| Incretin-Met     | 1.4840700  | 0.8219792 | -1.351546  | 2.627664 | 2.835615   | 2.872809 | 0.324   |
| Incretin-SGLT2   | -0.6953621 | 1.415385  | -3.290862  | 1.840680 | 2.595500   | 2.322331 | 0.264   |
| Incretin-SU      | -0.2371935 | 0.3228863 | -0.544095  | 2.200466 | 0.306902   | 2.194347 | 0.889   |
| Incretin-TZD     | 0.7718926  | 0.6665983 | 1.582636   | 2.109290 | -0.810744  | 2.264468 | 0.720   |
| Incretin-AGIs    | -1.093321  | 1.636751  | 0.0072262  | 874.9699 | -1.100547  | 874.9699 | 0.999   |
| Met-TZD          | 0.4122922  | 1.159855  | -0.990249  | 1.182037 | 1.402541   | 1.656088 | 0.397   |
| SGLT2-Placebo    | 2.131511   | 1.156422  | -0.463988  | 2.320800 | 2.595499   | 2.322331 | 0.264   |
| SU-Placebo       | 0.8999511  | 1.416756  | 0.3570821  | 0.347589 | 0.542869   | 1.458832 | 0.710   |
| TZD-Placebo      | 0.1474904  | 1.542448  | -0.9360247 | 0.725059 | 1.083515   | 1.776575 | 0.542   |

Appendix 7b Evaluation of the inconsistency by node-splitting model
