# Supplementary material for: Effect of incretin-based therapies on cancers of digestive system among 101 595 patients with type 2 diabetes mellitus: a systematic review and network meta-analysis combining 84 trials with a median duration of 30 weeks
Source: PubMed Central journal article supplement — BMJ Open Diabetes Res Care. 2019 Sep 20;7(1):e000728. doi: 10.1136/bmjdrc-2019-000728 (PMC6777405; doi:10.1136/bmjdrc-2019-000728), 2019-09-20
Supplement: bmjdrc-2019-000728supp010.pdf [file bmjdrc-2019-000728supp010.pdf]

## Appendix 10 Meta-regression for network meta-analyses compared with placebo

Table 1 Results of univariate meta-regression

| <b>Variables<br/>(No. of studies)<br/>Scale</b> | <b>Comparison</b>   | <b>Regression<br/>coefficient</b> | <b>Standard<br/>error</b> | <b>Proportional change in<br/>OR (95% CI)</b> | <b>P value</b> |
|-------------------------------------------------|---------------------|-----------------------------------|---------------------------|-----------------------------------------------|----------------|
| Age<br>Per 10 years                             | Incretin VS Placebo | -0.221095                         | 0.496844                  | 0.80(0.30,2.12)                               | 0.656          |
|                                                 | Insulin VS Placebo  | -0.150506                         | 8.926956                  | 0.86(2.17e-08,3.41e+07)                       | 0.987          |
|                                                 | Met VS Placebo      | 6.914018                          | 1258.909                  | NA                                            | 0.996          |
|                                                 | SU VS Placebo       | 0.784092                          | 1.270383                  | 2.19(0.18,26.42)                              | 0.537          |
|                                                 | TZD VS Placebo      | -0.717931                         | 729.8827                  | NA                                            | 0.999          |
| BMI<br>(123)<br>Per 1 kg/m <sup>2</sup>         | Incretin VS Placebo | -0.006005                         | 0.1044931                 | 0.99(0.81,660.64)                             | 0.954          |
|                                                 | Insulin VS Placebo  | 0.019944                          | 3.30275                   | 1.02(0.002,1.03)                              | 0.995          |
|                                                 | Met VS Placebo      | 0.8499565                         | 154.0751                  | 2.34(1.7e-131,3.3e+131)                       | 0.996          |
|                                                 | SU VS Placebo       | -0.2408509                        | 0.2750153                 | 0.79(0.46,1.35)                               | 0.381          |
|                                                 | TZD VS Placebo      | 0.0183281                         | 55.13116                  | 1.02(1.20e-47,8.62e+46)                       | 1.000          |
| HbA1c<br>(124)<br>Per 1%                        | Incretin VS Placebo | 0.1155811                         | 0.2208454                 | 1.12(0.73,1.73)                               | 0.601          |
|                                                 | Insulin VS Placebo  | 0.965176                          | 2.432701                  | 1.10(0.01,129.61)                             | 0.968          |
|                                                 | Met VS Placebo      | 0.0060799                         | 371.0757                  | NA                                            | 1.000          |
|                                                 | SU VS Placebo       | 0.4554837                         | 1.723957                  | 1.58(0.054,46.27)                             | 0.792          |
|                                                 | TZD VS Placebo      | 0.0473053                         | 431.689                   | NA                                            | 1.000          |
| DM duration<br>(111)<br>Per 1 years             | Incretin VS Placebo | 0.0387145                         | 0.0685746                 | 1.04(0.91,1.19)                               | 0.572          |
|                                                 | Insulin VS Placebo  | 0.0432332                         | 0.5767707                 | 1.04(0.34,3.23)                               | 0.940          |
|                                                 | Met VS Placebo      | -0.0176436                        | 156.9235                  | 0.98(2.6e-134,3.7e+133)                       | 1.000          |
|                                                 | SU VS Placebo       | 0.1842336                         | 0.2126941                 | 1.20(0.79,1.82)                               | 0.386          |
|                                                 | TZD VS Placebo      | 0.0528398                         | 104.0614                  | 1.05(2.79e-89,3.98e+88)                       | 1.000          |

Note: Due to the limited number of SGLT-2 and a-Glu compared to incretin-based therapies, they were not included in meta-regression.

Met: metformin; SU: sulphonylureas; TZD: thiazolidinediones.

Table 2 Results of multivariate meta-regression

| Comparison          | Variables          | Scale                   | Regression coefficient | Standard error   | Proportional change in OR (95% CI) | P value      |
|---------------------|--------------------|-------------------------|------------------------|------------------|------------------------------------|--------------|
| Incretin vs Placebo | Age                | Per 10 years            | -1.458008              | 0.8245859        | 0.23(0.05,1.17)                    | 0.077        |
|                     | BMI                | Per 1 kg/m <sup>2</sup> | -0.2004523             | 0.1457966        | 0.82(0.61,1.09)                    | 0.169        |
|                     | HbA1c              | Per 1%                  | 0.1672979              | 0.2730721        | 1.18(0.69,2.02)                    | 0.540        |
|                     | <b>DM duration</b> | <b>Per 1 years</b>      | <b>0.1994348</b>       | <b>0.3477171</b> | <b>1.28(1.00,1.65)</b>             | <b>0.048</b> |
| Insulin vs Placebo  | Age                | Per 10 years            | NA                     | NA               | NA                                 | NA           |
|                     | BMI                | Per 1 kg/m <sup>2</sup> | NA                     | NA               | NA                                 | NA           |
|                     | HbA1c              | Per 1%                  | -2.625439              | 817.0785         | NA                                 | 0.997        |
|                     | DM duration        | Per 1 years             | -0.5357169             | 193.7626         | 0.58(6.9e-166,5.0e+164)            | 0.998        |
| Met vs Placebo      | Age                | Per 10 years            | NA                     | NA               | NA                                 | NA           |
|                     | BMI                | Per 1 kg/m <sup>2</sup> | NA                     | NA               | NA                                 | NA           |
|                     | HbA1c              | Per 1%                  | 0.5927973              | 529.8334         | NA                                 | 0.999        |
|                     | DM duration        | Per 1 years             | 0.140215               | 191.4408         | 0.99(1.3e-163,1.0e+163)            | 0.999        |
| SU vs Placebo       | Age                | Per 10 years            | -9.708239              | 11496.93         | NA                                 | 0.999        |
|                     | BMI                | Per 1 kg/m <sup>2</sup> | -1.92131               | 3713.346         | 0.58(2.3e-211,1.5e+210)            | 0.998        |
|                     | HbA1c              | Per 1%                  | 1.445007               | 1625.121         | NA                                 | 1.000        |
|                     | DM duration        | Per 1 years             | 0.5672268              | 83.20875         | NA                                 | 0.999        |
| TZD vs Placebo      | Age                | Per 10 years            | NA                     | NA               | NA                                 | NA           |
|                     | BMI                | Per 1 kg/m <sup>2</sup> | 0.9771629              | 581.3705         | NA                                 | 0.999        |
|                     | HbA1c              | Per 1%                  | NA                     | NA               | NA                                 | NA           |
|                     | DM duration        | Per 1 years             | 1.928063               | 1112.619         | NA                                 | 0.999        |

Note: Due to the limited number of AGIs compared to incretin-based therapies, they were not included in meta-regression.

Met: metformin; SU: sulphonylureas; TZD: thiazolidinediones.

Table 3 Results of network meta-analysis before and after regression

| Comparison          | Before adjustment | x1               | x2                  | x3               | x4               | x1 x2 x3 x4     |
|---------------------|-------------------|------------------|---------------------|------------------|------------------|-----------------|
| Incretin vs Placebo | 0.87(0.71,1.05)   | 1.03(0.54,1.99)  | 0.91(0.69,1.21)     | 0.92(0.71,1.19)  | 0.79(0.48,1.30)  | 1.22(0.62,2.41) |
| Insulin vs Placebo  | 1.00(0.31,3.20)   | 1.03(0.08,13.20) | 0.87(0.00,62926.63) | 0.93(0.04,19.82) | 0.79(0.03,23.03) | NA              |
| Met vs Placebo      | 2.69(0.62,11.66)  | NA               | NA                  | NA               | NA               | NA              |
| SGLT-2 vs Placebo   | 0.16(0.02,1.47)   | NA               | NA                  | NA               | NA               | NA              |
| SU vs Placebo       | 0.68(0.35,1.32)   | 1.27(0.41,3.91)  | 1.35(0.50,3.64)     | 1.41(0.23,8.60)  | 0.90(0.26,3.10)  | NA              |
| TZD vs Placebo      | 2.04(0.60,6.95)   | NA               | NA                  | NA               | NA               | NA              |
| AGIs vs Placebo     | 0.29(0.01,7.19)   | NA               | NA                  | NA               | NA               | NA              |
