# Supplementary material for: Effect of incretin-based therapies on cancers of digestive system among 101 595 patients with type 2 diabetes mellitus: a systematic review and network meta-analysis combining 84 trials with a median duration of 30 weeks
Source: PubMed Central journal article supplement — BMJ Open Diabetes Res Care. 2019 Sep 20;7(1):e000728. doi: 10.1136/bmjdrc-2019-000728 (PMC6777405; doi:10.1136/bmjdrc-2019-000728), 2019-09-20
Supplement: bmjdrc-2019-000728supp011.pdf [file bmjdrc-2019-000728supp011.pdf]

## Appendix 11 Network estimates of treatment success with GRADE assessment

| Treatment comparison | Number of studies | Within-study bias | Across-studies bias | Indirectness | Imprecision    | Heterogeneity | Incoherence   | Confidence rating |
|----------------------|-------------------|-------------------|---------------------|--------------|----------------|---------------|---------------|-------------------|
| Incretin vs Insulin  | 7                 | Major concerns    | Undetected          | No concerns  | Major concerns | No concerns   | No concerns   | Low               |
| Met vs TZD           | 1                 | No concerns       | Undetected          | No concerns  | Major concerns | No concerns   | No concerns   | Moderate          |
| Incretin vs Met      | 4                 | No concerns       | suspicion           | No concerns  | Some concerns  | No concerns   | Some concerns | Moderate          |
| Incretin vs SGLT2    | 2                 | No concerns       | Undetected          | No concerns  | Major concerns | No concerns   | Some concerns | Moderate          |
| Placebo vs SGLT2     | 2                 | No concerns       | Undetected          | No concerns  | Major concerns | No concerns   | Some concerns | Moderate          |
| Incretin vs SU       | 17                | No concerns       | Undetected          | No concerns  | Major concerns | No concerns   | No concerns   | Moderate          |
| Placebo vs SU        | 2                 | No concerns       | Undetected          | No concerns  | Some concerns  | No concerns   | Some concerns | High              |
| Incretin vs TZD      | 5                 | No concerns       | Undetected          | No concerns  | Some concerns  | Some concerns | No concerns   | High              |
| Placebo vs TZD       | 1                 | No concerns       | Undetected          | No concerns  | Major concerns | No concerns   | No concerns   | Moderate          |

|                     |          |    |                |            |             |                |             |                |          |
|---------------------|----------|----|----------------|------------|-------------|----------------|-------------|----------------|----------|
| aGlu<br>incretin    | vs       | 1  | Some concerns  | Undetected | No concerns | Major concerns | No concerns | No concerns    | Moderate |
| Incretin<br>placebo | vs       | 54 | No concerns    | Undetected | No concerns | No concerns    | No concerns | Major concerns | Moderate |
| Insulin             | vs Met   | 0  | No concerns    | Undetected | No concerns | Major concerns | No concerns | No concerns    | Moderate |
| Insulin<br>SGLT2    | vs       | 0  | No concerns    | Undetected | No concerns | Major concerns | No concerns | No concerns    | Moderate |
| Insulin             | vs SU    | 0  | Major concerns | Undetected | No concerns | Major concerns | No concerns | No concerns    | Low      |
| Insulin<br>TZD      | vs       | 0  | No concerns    | Undetected | No concerns | Major concerns | No concerns | No concerns    | Moderate |
| aGlu<br>Insulin     | vs       | 0  | Major concerns | Undetected | No concerns | Major concerns | No concerns | No concerns    | Low      |
| Insulin<br>placebo  | vs       | 0  | Major concerns | Undetected | No concerns | Major concerns | No concerns | No concerns    | Low      |
| Met                 | vs SGLT2 | 0  | No concerns    | Undetected | No concerns | Some concerns  | No concerns | No concerns    | High     |
| Met                 | vs SU    | 0  | No concerns    | Undetected | No concerns | Some concerns  | No concerns | No concerns    | High     |
| aGlu                | vs Met   | 0  | No concerns    | Undetected | No concerns | Major concerns | No concerns | No concerns    | Moderate |

|                 |    |   |               |            |             |                |             |             |          |
|-----------------|----|---|---------------|------------|-------------|----------------|-------------|-------------|----------|
| Met<br>placebo  | vs | 0 | No concerns   | Undetected | No concerns | Major concerns | No concerns | No concerns | Moderate |
| SGLT2<br>SU     | vs | 0 | No concerns   | Undetected | No concerns | Major concerns | No concerns | No concerns | Moderate |
| SGLT2<br>TZD    | vs | 0 | No concerns   | Undetected | No concerns | Some concerns  | No concerns | No concerns | High     |
| aGlu vs SGLT2   |    | 0 | No concerns   | Undetected | No concerns | Major concerns | No concerns | No concerns | Moderate |
| SU vs TZD       |    | 0 | No concerns   | Undetected | No concerns | Some concerns  | No concerns | No concerns | High     |
| aGlu vs SU      |    | 0 | Some concerns | Undetected | No concerns | Major concerns | No concerns | No concerns | Moderate |
| aGlu vs TZD     |    | 0 | No concerns   | Undetected | No concerns | Major concerns | No concerns | No concerns | Moderate |
| aGlu vs placebo |    | 0 | Some concerns | Undetected | No concerns | Major concerns | No concerns | No concerns | Moderate |
